# Supplementary material for: Lagrangian eddy tracking reveals the Eratosthenes anticyclonic attractor in the eastern Levantine Basin
Source: Copernicus journal article supplement (doi:10.5194/os-17-1231-2021), 2021-09-15
Supplement: Supplementary file 1 [file os-17-1231-2021-supplement.zip]

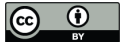

*Supplement of*

## **Lagrangian eddy tracking reveals the Eratosthenes anticyclonic attractor in the eastern Levantine Basin**

**Alexandre Barboni et al.**

*Correspondence to:* Alexandre Barboni ([alexandre.barboni@polytechnique.edu](mailto:alexandre.barboni@polytechnique.edu))

- [os-17-1231-2021-supplement-title-page.pdf](#)
- [SeaDataNet\\_list.txt](#)

The copyright of individual parts of the supplement might differ from the article licence.
