# Supplementary material for: Lagrangian eddy tracking reveals the Eratosthenes anticyclonic attractor in the eastern Levantine Basin
Source: Copernicus journal article supplement (doi:10.5194/os-17-1231-2021), 2021-09-15
Supplement: Supplementary file 2 [file os-17-1231-2021-supplement.zip]

Archive with 2 entries (2 files):
- os-17-1231-2021-supplement-title-page.pdf
- SeaDataNet_list.txt
