# Supplementary material for: Lagrangian eddy tracking reveals the Eratosthenes anticyclonic attractor in the eastern Levantine Basin
Source: Copernicus journal article supplement (doi:10.5194/os-17-1231-2021), 2021-09-15
Supplement: Supplementary file 2 [file os-17-1231-2021-supplement.zip › SeaDataNet_list.txt]

Data type	Cruise	yyyy-mm-ddThh:mm:ss.sss	Longitude [degrees_east]	Latitude [degrees_north]
CTD	EMTEC-ME5152600	2001-10-26T08:30:00.000	24.3336667	34.6666667
CTD	EMTEC-ME5152700	2001-10-26T15:33:00.000	25.086	34.563
CTD	EMTEC-ME5153000	2001-10-30T15:57:00.000	26.1666667	34.3195
CTD	EMTEC-ME5153300	2001-10-31T13:12:00.000	26.5378333	34.9823333
CTD	EMTEC-ME5153400	2001-10-31T17:18:00.000	26.6503333	35.2846667
CTD	EMTEC-ME5153600	2001-11-01T06:00:00.000	27.5	34.3326667
CTD	EMTEC-ME5153700	2001-11-01T13:48:00.000	28.8508333	34.0336667
CTD	EMTEC-ME5153800	2001-11-01T20:18:00.000	29.5108333	34.0066667
CTD	EMTEC-ME5153900	2001-11-02T02:43:00.000	30.501	33.8656667
CTD	EMTEC-ME5154000	2001-11-02T09:21:00.000	31.1985	33.962
CTD	EMTEC-ME5154100	2001-11-02T16:36:00.000	32.12	34.0646667
CTD	EMTEC-ME5154200	2001-11-03T05:45:00.000	32.9966667	34.0833333
CTD	EMTEC-ME5154300	2001-11-03T20:36:00.000	34.1926667	34.0021667
CTD	EMTEC-ME5154400	2001-11-04T05:46:00.000	33.0103333	33.4975
CTD	EMTEC-ME5154500	2001-11-04T12:44:00.000	31.839	33.4993333
CTD	EMTEC-ME5154600	2001-11-04T22:36:00.000	29.9973333	33.2486667
CTD	EMTEC-ME5154700	2001-11-05T10:42:00.000	28.0035	33.0006667
CTD	EMTEC-ME5154900	2001-11-06T11:19:00.000	25.5183333	32.522
CTD	EMTEC-ME5155000	2001-11-06T17:07:00.000	25.5843333	33.2011667
CTD	EMTEC-ME5155100	2001-11-06T20:17:00.000	25.6201667	33.4565
CTD	EMTEC-ME5155200	2001-11-07T01:50:00.000	25.6193333	34.191
CTD	EMTEC-ME51B5420	2001-11-03T08:27:00.000	32.9975	34.0811667
CTD	EMTEC-ME51B5470	2001-11-05T13:06:00.000	28.0031667	33.0006667
CTD	EMTEC-ME51S5270	2001-10-26T14:11:00.000	25.0865	34.564
CTD	EMTEC-ME51S5290	2001-10-30T15:00:00.000	26.206	34.4438333
CTD	EMTEC-ME51S5360	2001-11-01T04:05:00.000	27.501	34.331
CTD	EMTEC-ME51S5380	2001-11-01T18:36:00.000	29.5008333	34.0006667
CTD	EMTEC-ME51S5400	2001-11-02T07:46:00.000	31.202	33.9623333
CTD	EMTEC-ME51S5420	2001-11-03T04:05:00.000	32.9995	34.0828333
CTD	EMTEC-ME51S5430	2001-11-03T18:55:00.000	34.1913333	34.0
CTD	EMTEC-ME51S5440	2001-11-04T04:04:00.000	33.0006667	33.4995
CTD	EMTEC-ME51S5490	2001-11-06T09:40:00.000	25.5315	32.5158333
CTD	HERMES-1c17	2005-05-23T15:45:00.000	24.259	35.153
CTD	HERMES-1c18	2005-05-23T13:55:00.000	24.30183	35.101
CTD	HERMES-1c19	2005-05-23T11:20:00.000	24.438	34.9705
CTD	HERMES-1c20	2005-05-18T18:30:00.000	24.548	34.86567
CTD	HERMES-1c21	2005-05-21T07:00:00.000	24.69617	34.74217
CTD	HERMES-1c22	2005-05-22T05:30:00.000	24.84983	34.576
CTD	HERMES-1c28	2005-05-21T21:40:00.000	25.12333	34.80933
CTD	HERMES-1c50	2005-05-21T23:55:00.000	25.0055	34.7005
CTD	HERMES-1c51	2005-05-22T02:35:00.000	25.17683	34.5195
CTD	HERMES-1c52	2005-05-22T08:30:00.000	24.533	34.66867
CTD	HERMES-1c53	2005-05-22T11:20:00.000	24.87817	34.83717
CTD	HERMES-2c17	2005-10-02T08:45:00.000	24.25783	35.15383
CTD	HERMES-2c18	2005-10-03T16:10:00.000	24.3035	35.10183
CTD	HERMES-2c19	2005-10-03T13:20:00.000	24.43633	34.9715
CTD	HERMES-2c20	2005-10-03T06:55:00.000	24.5495	34.8665
CTD	HERMES-2c21	2005-09-21T07:00:00.000	24.69617	34.74217
CTD	HERMES-2c22	2005-10-05T05:40:00.000	24.85967	34.5765
CTD	HERMES-2c28	2005-10-04T10:00:00.000	25.12233	34.8135
CTD	HERMES-2c50	2005-10-04T19:15:00.000	25.006	34.70067
CTD	HERMES-2c52	2005-10-04T02:10:00.000	24.53383	34.66933
CTD	HERMES-2c53	2005-10-04T06:50:00.000	24.88483	34.83533
CTD	SESAME WP2 03/2008000L1	2008-03-29T19:40:00.000	26.002667	34.751167
CTD	SESAME WP2 03/2008000L2	2008-03-30T05:30:00.000	26.004833	34.557833
CTD	SESAME WP2 03/200800L2a	2008-03-30T07:10:00.000	25.999167	34.5635
CTD	SESAME WP2 03/200800L2b	2008-03-30T12:10:00.000	26.016333	34.5505
CTD	SESAME WP2 03/200800L3a	2008-03-30T17:35:00.000	26.0005	34.3785
CTD	SESAME WP2 03/200800L3b	2008-03-30T22:15:00.000	26.012833	34.369167
CTD	SESAME WP2 08/200800L01	2008-08-31T22:45:00.000	26.001833	34.736333
CTD	SESAME WP2 08/20080L02a	2008-09-01T01:20:00.000	26.0005	34.565667
CTD	SESAME WP2 08/20080L02b	2008-09-01T04:30:00.000	25.9955	34.570667
CTD	SESAME WP2 08/20080L02c	2008-09-01T09:50:00.000	26.006167	34.559333
CTD	SESAME WP2 08/20080L03a	2008-08-31T14:25:00.000	26.002667	34.377167
CTD	SESAME WP2 08/20080L03b	2008-08-31T19:20:00.000	25.9995	34.379
CTD	SESAME WP2 08/20080L04a	2008-08-31T09:40:00.000	26.095833	34.128167
CTD	BIO-ARGO-MED-201500004	2015-05-21T12:21:00.000	28.4665	33.565167
CTD	BIO-ARGO-MED-201500005	2015-05-21T14:14:00.000	28.469667	33.562667
CTD	BIO-ARGO-MED-201500006	2015-05-22T10:33:00.000	24.830667	34.2315
CTD	BIO-ARGO-MED-201500007	2015-05-22T15:02:00.000	24.845833	34.210167
CTD	BIO-ARGO-MED-201500008	2015-05-22T17:04:00.000	24.842667	34.211
CTD	SHOM-200012339584	2000-11-24T07:00:56.000	27.00017	34.15983
CTD	SHOM-200012339585	2000-11-24T08:07:30.000	26.97317	34.13483
CTD	SHOM-200012339586	2000-11-24T11:40:17.000	27.5	34.15717
CTD	SHOM-200012339587	2000-11-24T12:36:28.000	27.48683	34.13417
CTD	SHOM-200012339588	2000-11-24T16:03:12.000	28.001	34.16667
CTD	SHOM-200012339589	2000-11-24T16:53:41.000	28.00617	34.16933
CTD	SHOM-200012339590	2000-11-24T19:49:43.000	28.5	34.158
CTD	SHOM-200012339591	2000-11-24T20:40:44.000	28.5215	34.15583
CTD	SHOM-200012339592	2000-11-25T00:21:04.000	29.00883	34.158
CTD	SHOM-200012339593	2000-11-25T01:18:01.000	29.03633	34.15583
CTD	SHOM-200012339594	2000-11-25T07:08:37.000	28.49117	34.659
CTD	SHOM-200012339595	2000-11-25T08:03:11.000	28.4835	34.659
CTD	SHOM-200012339599	2000-11-26T05:46:15.000	27.51733	34.667
CTD	SHOM-200012339600	2000-11-26T06:52:27.000	27.51733	34.66733
CTD	SHOM-200112339821	2001-02-11T01:34:09.000	27.00083	34.16667
CTD	SHOM-200112339822	2001-02-11T02:35:45.000	27.03333	34.18383
CTD	SHOM-200112339823	2001-02-11T05:19:59.000	27.5	34.16667
CTD	SHOM-200112339824	2001-02-11T06:20:59.000	27.53333	34.18383
CTD	SHOM-200112339825	2001-02-11T09:22:51.000	28.0	34.16667
CTD	SHOM-200112339826	2001-02-11T10:11:57.000	28.00367	34.18683
CTD	SHOM-200112339827	2001-02-11T13:07:05.000	28.5	34.16667
CTD	SHOM-200112339828	2001-02-11T13:31:01.000	28.50067	34.167
CTD	SHOM-200112339829	2001-02-11T15:53:09.000	29.00017	34.15967
CTD	SHOM-200112339830	2001-02-11T16:18:53.000	29.017	34.15067
CTD	SHOM-200112339831	2001-02-11T20:06:51.000	28.5	34.66667
CTD	SHOM-200112339832	2001-02-11T20:31:59.000	28.48367	34.667
CTD	SHOM-200112339833	2001-02-11T22:58:09.000	28.0	34.66667
CTD	SHOM-200112339834	2001-02-11T23:19:49.000	27.98417	34.66683
CTD	SHOM-200112339835	2001-02-12T01:52:43.000	27.5	34.66667
CTD	SHOM-200112339836	2001-02-12T02:15:17.000	27.48383	34.66683
CTD	SHOM-200112339837	2001-02-12T04:50:05.000	27.0005	34.48417
CTD	SHOM-200112339838	2001-02-12T05:14:11.000	27.0035	34.47383
CTD	SHOM-200112339839	2001-02-12T07:35:23.000	27.00117	34.8245
CTD	SHOM-200112339840	2001-02-12T07:58:59.000	27.0025	34.82167
CTD	Cruise 2000-05F15K30	2000-10-28T10:10:00.000	28.5	35.25
CTD	Cruise 2000-05F15K30	2000-10-28T10:50:00.000	28.5	35.25
CTD	Cruise 2000-05F15K30	2000-10-28T11:35:00.000	28.5	35.25
CTD	Cruise 2000-05F15K30	2000-10-28T13:10:00.000	28.5	35.25
CTD	Cruise 2000-05F15L00	2000-10-28T16:46:00.000	29.0	35.25
CTD	UNLUATA Cruises: Levantine BasinF10N00	2008-04-03T02:18:00.000	31.0022	35.1664
CTD	UNLUATA Cruises: Levantine BasinE30N00	2008-04-03T09:16:00.000	31.0013	34.5008
CTD	UNLUATA Cruises: Levantine BasinE30N00	2008-04-03T10:02:00.000	31.0018	34.5032
CTD	UNLUATA Cruises: Levantine BasinE30N00	2008-04-03T12:06:00.000	31.0021	34.5116
CTD	UNLUATA Cruises: Levantine BasinE10N00	2008-04-03T15:33:00.000	31.005	34.1663
CTD	UNLUATA Cruises: Levantine BasinE10N00	2008-04-03T16:31:00.000	31.0349	34.1634
CTD	UNLUATA Cruises: Levantine BasinC56M57	2008-04-04T04:50:00.000	30.9472	32.9354
CTD	UNLUATA Cruises: Levantine BasinD10N00	2008-04-04T08:12:00.000	30.9991	33.1682
CTD	UNLUATA Cruises: Levantine BasinD30N00	2008-04-04T11:22:00.000	30.9998	33.5018
CTD	UNLUATA Cruises: Levantine BasinD50N00	2008-04-04T14:50:00.000	30.9997	33.8334
CTD	Cruise 2008-06F10N00	2008-10-19T01:25:00.000	31.0012	35.1668
CTD	Cruise 2008-06E50N00	2008-10-19T04:20:00.000	31.0005	34.8324
CTD	Cruise 2008-06E30N00	2008-10-19T08:31:00.000	30.9966	34.5005
CTD	Cruise 2008-06E30N00	2008-10-19T08:33:00.000	30.9966	34.5005
CTD	Cruise 2008-06E30N00	2008-10-19T09:15:00.000	30.9909	34.4992
CTD	Cruise 2008-06E30N00	2008-10-19T11:02:00.000	30.9893	34.497
CTD	Cruise 2008-06E30N00	2008-10-19T11:24:00.000	30.9893	34.4969
CTD	Cruise 2008-06E10N00	2008-10-19T14:38:00.000	31.0068	34.1649
CTD	Cruise 2008-06D50N00	2008-10-19T17:46:00.000	30.9998	33.8346
CTD	Cruise 2008-06D50N00	2008-10-19T19:19:00.000	30.994	33.8233
CTD	Cruise 2008-06D50N00	2008-10-19T19:51:00.000	30.9937	33.8227
CTD	Cruise 2008-06D30N00	2008-10-19T21:57:00.000	30.9985	33.501
CTD	Cruise 2008-06D00N00	2008-10-20T02:09:00.000	30.9985	32.9995
CTD	Cruise 2008-06D15N00	2008-10-20T04:50:00.000	31.0039	33.2513
CTD	Cruise 2008-06D15N00	2008-10-20T04:48:00.000	31.0039	33.2513
CTD	Cruise 2008-06D15N00	2008-10-20T05:26:00.000	31.0067	33.2505
CTD	Cruise 2008-06D15N00	2008-10-20T06:00:00.000	31.0158	33.2453
CTD	Cruise 2008-06D15N00	2008-10-20T06:27:00.000	31.0221	33.2444
CTD	Argo 690189812_R_A	2014-01-17T06:37:15.000	32.638	35.299
CTD	Argo 690189813_R_A	2014-01-22T06:34:25.000	32.546	35.255
CTD	Argo 690189726_R_A	2014-03-28T07:29:21.000	27.356	35.288
CTD	Argo 690189727_R_A	2014-04-02T06:31:15.000	27.185	35.14
CTD	Argo 690189728_R_A	2014-04-07T06:27:41.000	27.031	35.055
CTD	Argo 690189729_R_A	2014-04-12T06:08:42.000	26.961	35.043
CTD	Argo 690189730_R_A	2014-04-17T06:20:15.000	26.703	34.981
CTD	Argo 690189731_R_A	2014-04-22T06:16:42.000	26.084	34.805
CTD	Argo 690189732_R_A	2014-04-27T06:14:47.000	25.855	34.485
CTD	Argo 690189733_R_A	2014-05-02T06:11:43.000	25.877	34.275
CTD	Argo 690189734_R_A	2014-05-07T06:08:12.000	25.854	34.201
CTD	Argo 690189735_R_A	2014-05-12T06:44:31.000	25.826	34.031
CTD	Argo 690189736_R_A	2014-05-17T06:54:17.000	25.901	33.915
CTD	Argo 690189737_R_A	2014-05-22T06:19:53.000	26.13	33.925
CTD	Argo 690189738_R_A	2014-05-27T07:02:03.000	26.215	33.974
CTD	Argo 690189814_R_A	2014-01-27T06:30:24.000	32.382	35.203
CTD	Argo 690189815_R_A	2014-02-01T06:27:40.000	32.235	35.244
CTD	Argo 690189816_R_A	2014-02-06T06:03:04.000	32.156	35.204
CTD	Argo 690189817_R_A	2014-02-11T06:22:13.000	32.157	35.322
CTD	Argo 690189818_R_A	2014-02-16T06:19:55.000	32.01	35.355
CTD	Argo 690189819_R_A	2014-02-21T06:16:26.000	31.924	35.227
CTD	Argo 690189820_R_A	2014-02-26T06:10:20.000	31.826	35.213
CTD	Argo 690189821_R_A	2014-03-03T06:00:55.000	31.981	35.335
CTD	Argo 690189739_R_A	2014-06-01T06:43:39.000	26.192	34.067
CTD	Argo 690189740_R_A	2014-06-06T06:40:19.000	26.277	34.117
CTD	Argo 690189741_R_A	2014-06-11T06:37:31.000	26.237	34.326
CTD	Argo 690189742_R_A	2014-06-16T06:34:10.000	26.367	34.401
CTD	Argo 690189743_R_A	2014-06-21T06:31:17.000	26.326	34.465
CTD	Argo 690189744_R_A	2014-06-26T06:27:10.000	26.268	34.538
CTD	Argo 690189745_R_A	2014-07-01T06:26:43.000	25.98	34.637
CTD	Argo 690189746_R_A	2014-07-06T07:08:36.000	25.482	34.731
CTD	Argo 690189747_R_A	2014-07-11T06:16:55.000	25.343	34.524
CTD	Argo 690189748_R_A	2014-07-16T06:59:16.000	25.259	34.226
CTD	Argo 690189749_R_A	2014-07-21T06:56:04.000	25.289	33.83
CTD	Argo 690189750_R_A	2014-07-26T06:52:14.000	25.261	33.644
CTD	Argo 690189751_R_A	2014-07-31T06:50:22.000	25.215	33.413
CTD	Argo 690189752_R_A	2014-08-05T06:46:43.000	25.369	33.276
CTD	Argo 690189753_R_A	2014-08-10T06:44:15.000	25.546	33.164
CTD	Argo 690189754_R_A	2014-08-15T06:39:31.000	25.737	33.104
CTD	Argo 690189755_R_A	2014-08-20T06:36:10.000	26.029	33.157
CTD	Argo 690189756_R_A	2014-08-25T06:32:58.000	26.14	33.298
CTD	Argo 690189757_R_A	2014-08-30T06:29:00.000	26.302	33.472
CTD	Argo 690189758_R_A	2014-09-04T06:25:00.000	26.431	33.66
CTD	Argo 690189759_R_A	2014-09-09T06:23:00.000	26.798	33.888
CTD	Argo 690189760_R_A	2014-09-14T06:23:00.000	27.42	33.796
CTD	Argo 690189761_R_A	2014-09-19T06:17:00.000	28.499	33.787
CTD	Argo 690189762_R_A	2014-09-24T06:13:00.000	29.259	32.699
CTD	Argo 690189763_R_A	2014-09-29T07:00:00.000	28.528	33.432
CTD	Argo 690189764_R_A	2014-10-04T06:06:00.000	29.41	33.15
CTD	Argo 690189765_R_A	2014-10-09T07:40:00.000	28.199	33.208
CTD	Argo 690189766_R_A	2014-10-14T06:49:00.000	28.841	33.723
CTD	Argo 690189767_R_A	2014-10-19T06:47:00.000	29.37	32.902
CTD	Argo 690189768_R_A	2014-10-24T07:30:00.000	28.283	33.452
CTD	Argo 690189769_R_A	2014-10-29T06:39:00.000	29.037	33.882
CTD	Argo 690189770_R_A	2014-11-03T06:35:00.000	29.526	33.183
CTD	Argo 690189771_R_A	2014-11-08T06:33:00.000	29.135	32.664
CTD	Argo 690189772_R_A	2014-11-13T06:30:00.000	28.322	33.213
CTD	Argo 690189773_R_A	2014-11-18T06:26:00.000	29.413	33.218
CTD	Argo 690189774_R_A	2014-11-23T06:24:00.000	28.299	33.401
CTD	Argo 690189775_R_A	2014-11-28T06:19:00.000	29.34	33.078
CTD	Argo 690189776_R_A	2014-12-03T06:18:00.000	28.845	32.581
CTD	Argo 690189777_R_A	2014-12-08T06:59:00.000	28.342	32.633
CTD	Argo 690189778_R_A	2014-12-13T06:56:00.000	27.999	32.963
CTD	Argo 690189779_R_A	2014-12-18T06:56:00.000	27.763	33.163
CTD	Argo 690189780_R_A	2014-12-23T06:49:00.000	27.625	33.278
CTD	Argo 690189781_R_A	2014-12-28T06:46:00.000	27.597	33.231
CTD	Argo 690189782_R_A	2015-01-02T06:42:00.000	27.59	33.104
CTD	Argo 690189783_R_A	2015-01-07T06:39:00.000	27.631	32.909
CTD	Argo 690189784_R_A	2015-01-12T06:35:00.000	27.585	32.859
CTD	Argo 690189785_R_A	2015-01-17T06:32:00.000	27.752	32.891
CTD	Argo 690189786_R_A	2015-01-22T06:29:00.000	27.559	32.992
CTD	Argo 690189787_R_A	2015-01-27T06:25:00.000	27.853	33.149
CTD	Argo 690189788_R_A	2015-02-01T06:22:00.000	28.139	33.364
CTD	Argo 690189789_R_A	2015-02-06T06:20:00.000	29.065	33.128
CTD	Argo 690189790_R_A	2015-02-11T06:16:00.000	29.556	32.899
CTD	Argo 690189791_R_A	2015-02-16T06:11:00.000	29.899	32.97
CTD	Argo 690189792_R_A	2015-02-21T06:12:00.000	29.842	32.988
CTD	Argo 690189793_R_A	2015-02-26T06:10:00.000	29.985	32.843
CTD	Argo 690189794_R_A	2015-03-03T06:54:00.000	30.348	32.678
CTD	Argo 690189795_R_A	2015-03-08T06:49:00.000	30.871	32.145
CTD	Argo 690189796_R_A	2015-03-13T06:46:00.000	30.825	32.374
CTD	Argo 690189797_R_A	2015-03-18T06:44:00.000	31.193	32.257
CTD	Argo 690189798_R_A	2015-03-23T06:41:00.000	30.958	32.756
CTD	Argo 690189799_R_A	2015-03-28T06:37:00.000	31.152	33.075
CTD	Argo 6901897100_R_A	2015-04-02T06:34:00.000	31.08	33.045
CTD	Argo 6901897101_R_A	2015-04-07T06:31:00.000	30.454	33.133
CTD	Argo 6901897102_R_A	2015-04-12T06:27:00.000	30.08	33.221
CTD	Argo 6901897103_R_A	2015-04-17T06:24:00.000	29.583	33.189
CTD	Argo 6901897104_R_A	2015-04-22T07:06:00.000	29.31	32.881
CTD	Argo 6901897105_R_A	2015-04-27T06:19:00.000	29.264	32.605
CTD	Argo 6901897106_R_A	2015-05-02T06:13:00.000	29.092	32.311
CTD	Argo 6901897107_R_A	2015-05-07T06:13:00.000	29.284	32.028
CTD	Argo 6901897108_R_A	2015-05-12T06:13:00.000	29.592	32.173
CTD	Argo 6901897109_R_A	2015-05-17T06:49:00.000	29.851	32.557
CTD	Argo 6901897110_R_A	2015-05-22T06:45:00.000	29.853	32.851
CTD	Argo 6901897111_R_A	2015-05-27T06:42:00.000	29.673	32.991
CTD	Argo 6901897112_R_A	2015-06-01T06:39:00.000	29.312	33.156
CTD	Argo 6901897113_R_A	2015-06-06T06:35:00.000	29.175	33.736
CTD	Argo 6901897114_R_A	2015-06-11T06:32:00.000	29.817	34.104
CTD	Argo 6901897115_R_A	2015-06-16T06:28:00.000	29.93	33.291
CTD	Argo 6901897116_R_A	2015-06-21T06:24:00.000	29.525	32.983
CTD	Argo 6901897117_R_A	2015-06-26T06:22:00.000	29.246	33.143
CTD	Argo 6901897118_R_A	2015-07-01T06:18:00.000	28.944	33.509
CTD	Argo 6901897119_R_A	2015-07-06T06:18:00.000	28.839	33.943
CTD	Argo 690189886_R_A	2015-01-22T06:29:00.000	26.996	35.283
CTD	Argo 6901897148_R_A	2015-11-28T06:16:00.000	34.449	32.664
CTD	Argo 6901897147_R_A	2015-11-23T06:16:00.000	34.544	33.039
CTD	Argo 6901897146_R_A	2015-11-18T06:20:00.000	34.173	33.281
CTD	Argo 6901897145_R_A	2015-11-13T06:23:00.000	33.783	33.158
CTD	Argo 6901897144_R_A	2015-11-08T06:27:00.000	33.5	33.05
CTD	Argo 6901897143_R_A	2015-11-03T06:30:00.000	33.454	32.903
CTD	Argo 6901897142_R_A	2015-10-29T06:33:00.000	33.215	32.878
CTD	Argo 6901897141_R_A	2015-10-24T06:37:00.000	33.043	32.907
CTD	Argo 6901897140_R_A	2015-10-19T06:40:00.000	33.186	33.334
CTD	Argo 6901897139_R_A	2015-10-14T06:44:00.000	32.932	34.069
CTD	Argo 6901897138_R_A	2015-10-09T06:48:00.000	32.417	34.037
CTD	Argo 6901897137_R_A	2015-10-04T06:51:00.000	32.559	33.31
CTD	Argo 6901897136_R_A	2015-09-29T06:15:00.000	33.122	33.39
CTD	Argo 6901897135_R_A	2015-09-24T06:13:00.000	32.299	33.896
CTD	Argo 6901897134_R_A	2015-09-19T06:15:00.000	32.257	33.592
CTD	Argo 6901897133_R_A	2015-09-14T06:20:00.000	33.315	33.416
CTD	Argo 6901897132_R_A	2015-09-09T06:22:00.000	32.954	33.977
CTD	Argo 6901897131_R_A	2015-09-04T06:25:00.000	31.887	33.715
CTD	Argo 6901897130_R_A	2015-08-30T06:30:00.000	31.446	33.944
CTD	Argo 6901897129_R_A	2015-08-25T06:33:00.000	31.026	33.916
CTD	Argo 6901897128_R_A	2015-08-20T06:36:00.000	30.712	33.748
CTD	Argo 6901897127_R_A	2015-08-15T06:40:00.000	30.57	33.551
CTD	Argo 6901897126_R_A	2015-08-10T06:43:00.000	30.504	33.464
CTD	Argo 6901897125_R_A	2015-08-05T06:47:00.000	30.448	33.345
CTD	Argo 6901897124_R_A	2015-07-31T06:52:00.000	30.414	33.404
CTD	Argo 6901897123_R_A	2015-07-26T06:55:00.000	30.284	33.522
CTD	Argo 6901897122_R_A	2015-07-21T06:54:00.000	30.135	33.687
CTD	Argo 6901897121_R_A	2015-07-16T07:00:00.000	29.957	33.906
CTD	Argo 6901897120_R_A	2015-07-11T06:11:00.000	29.251	34.202
CTD	Argo 6901897149_R_A	2015-12-03T06:12:00.000	34.227	32.657
CTD	Argo 6901897150_R_A	2015-12-08T06:14:00.000	33.924	32.745
CTD	Argo 6901897151_R_A	2015-12-13T07:42:00.000	33.648	32.862
CTD	Argo 6901897152_R_A	2015-12-18T06:55:00.000	33.54	32.932
CTD	Argo 6901897153_R_A	2015-12-23T06:51:00.000	33.493	33.054
CTD	Argo 6901897154_R_A	2015-12-28T06:46:00.000	33.303	33.187
CTD	Argo 6901897155_R_A	2016-01-02T06:43:00.000	33.19	33.259
CTD	Argo 6901897156_R_A	2016-01-07T06:40:00.000	33.037	33.246
CTD	Argo 6901897157_R_A	2016-01-12T06:34:00.000	32.989	33.222
CTD	Argo 6901897158_R_A	2016-01-17T06:32:00.000	32.736	33.208
CTD	Argo 6901897159_R_A	2016-01-22T06:27:00.000	32.603	33.257
CTD	Argo 6901897160_R_A	2016-01-27T06:25:00.000	32.526	33.203
CTD	Argo 6901897161_R_A	2016-02-01T06:19:00.000	32.26	33.413
CTD	Argo 6901897162_R_A	2016-02-06T06:17:00.000	31.981	33.787
CTD	Argo 6901897163_R_A	2016-02-11T06:13:00.000	31.879	34.352
CTD	Argo 6901897164_R_A	2016-02-16T06:14:00.000	32.267	34.643
CTD	Argo 6901897165_R_A	2016-02-21T06:55:00.000	31.972	34.782
CTD	Argo 6901897166_R_A	2016-02-26T06:51:00.000	31.91	34.725
CTD	Argo 6901897167_R_A	2016-03-02T06:48:00.000	31.71	34.656
CTD	Argo 6901897168_R_A	2016-03-07T06:48:00.000	31.417	34.701
CTD	Argo 6901897169_R_A	2016-03-12T06:41:00.000	31.103	34.727
CTD	Argo 6901897170_R_A	2016-03-17T06:38:00.000	31.177	34.921
CTD	Argo 6901897171_R_A	2016-03-22T06:34:00.000	31.443	35.012
CTD	Argo 6901897172_R_A	2016-03-27T06:31:00.000	31.512	34.948
CTD	Argo 6901897173_R_A	2016-04-01T06:16:00.000	31.589	34.967
CTD	Argo 6901897174_R_A	2016-04-06T06:25:00.000	31.561	35.048
CTD	Argo 6901897175_R_A	2016-04-11T06:21:00.000	31.812	35.243
CTD	Argo 6901897176_R_A	2016-04-16T06:20:00.000	32.109	35.17
CTD	Argo 6901897178_R_A	2016-04-26T07:05:00.000	32.499	35.363
CTD	Argo 6901897180_R_A	2016-05-06T06:55:00.000	32.286	35.362
CTD	SHODB530576	2010-01-23T00:33:00.0	33.242	34.031
CTD	SHODB530577	2010-01-24T00:43:00.0	33.304	34.002
CTD	SHODB531163	2010-03-01T00:36:00.0	33.4	34.007
CTD	SHODB534233	2010-01-14T07:04:00.0	32.255	34.331
CTD	SHODB534234	2010-01-19T03:11:00.0	32.317	34.339
CTD	SHODB534235	2010-01-24T07:04:00.0	32.425	34.367
CTD	SHODB534236	2010-01-29T03:11:00.0	32.398	34.431
CTD	SHODB534237	2010-02-03T07:10:00.0	32.46	34.469
CTD	SHODB534238	2010-02-08T03:11:00.0	32.596	34.42
CTD	SHODB534239	2010-02-13T07:16:00.0	32.742	34.438
CTD	SHODB534240	2010-02-18T03:11:00.0	32.914	34.471
CTD	SHODB534241	2010-02-23T04:46:00.0	33.109	34.488
CTD	SHODB534242	2010-02-28T03:11:00.0	33.412	34.44
CTD	SHODB534243	2010-03-05T07:04:00.0	33.999	34.0
CTD	SHODB534255	2010-05-04T07:10:00.0	33.101	34.107
CTD	SHODB534256	2010-05-09T03:11:00.0	33.284	34.254
CTD	SHODB534257	2010-05-14T04:23:00.0	33.496	34.308
CTD	SHODB534258	2010-05-19T03:11:00.0	33.817	34.229
CTD	SHODB534259	2010-05-24T07:29:00.0	34.131	34.227
CTD	SHODB534260	2010-05-29T03:11:00.0	34.29	34.264
CTD	SHODB534261	2010-06-03T07:10:00.0	34.373	34.31
CTD	SHODB534262	2010-06-08T03:11:00.0	34.389	34.257
CTD	SHODB534263	2010-06-13T07:10:00.0	34.383	34.184
CTD	SHODB534264	2010-06-18T03:10:00.0	34.762	34.325
CTD	SHODB534265	2010-06-23T06:57:00.0	34.918	34.48
CTD	SHODB534266	2010-06-28T03:10:00.0	35.19	34.684
CTD	SHODB534267	2010-07-03T06:10:00.0	35.294	34.845
CTD	SHODB534268	2010-07-08T03:10:00.0	35.304	35.056
CTD	SHODB534269	2010-07-13T04:33:00.0	35.364	35.198
CTD	SHODB534270	2010-07-18T02:58:00.0	35.448	35.356
CTD	SHODB534448	2010-01-02T14:31:00.0	30.685	35.189
CTD	SHODB534449	2010-01-07T14:25:00.0	30.6	35.231
CTD	SHODB534450	2010-01-12T14:24:00.0	30.494	35.262
CTD	SHODB534451	2010-01-17T14:28:00.0	30.402	35.289
CTD	SHODB534452	2010-01-22T14:28:00.0	30.277	35.293
CTD	SHODB534453	2010-01-27T14:24:00.0	30.096	35.325
CTD	SHODB534454	2010-02-01T11:52:00.0	29.991	35.372
CTD	SHODB534455	2010-02-06T15:23:00.0	29.951	35.386
CTD	SHODB534479	2010-06-16T15:21:00.0	27.673	35.322
CTD	SHODB534480	2010-06-21T15:33:00.0	27.509	35.256
CTD	SHODB534481	2010-06-26T15:27:00.0	27.438	35.208
CTD	SHODB534482	2010-07-01T14:44:00.0	27.431	35.157
CTD	SHODB534483	2010-07-06T14:16:00.0	27.418	35.101
CTD	SHODB534484	2010-07-11T14:31:00.0	27.389	35.057
CTD	SHODB534485	2010-07-16T14:52:00.0	27.355	35.032
CTD	SHODB534486	2010-07-21T15:25:00.0	27.318	35.012
CTD	SHODB534487	2010-07-26T15:25:00.0	27.235	34.926
CTD	SHODB534488	2010-07-31T15:27:00.0	27.134	34.777
CTD	SHODB534489	2010-08-05T15:25:00.0	27.09	34.642
CTD	SHODB534490	2010-08-10T15:31:00.0	27.034	34.554
CTD	SHODB534491	2010-08-15T15:30:00.0	26.914	34.447
CTD	SHODB534492	2010-08-20T15:27:00.0	26.769	34.341
CTD	SHODB534493	2010-08-25T15:28:00.0	26.62	34.278
CTD	SHODB534494	2010-08-30T15:31:00.0	26.414	34.219
CTD	SHODB534582	2010-03-02T00:31:00.0	33.598	34.082
CTD	SHODB534708	2010-07-08T00:37:00.0	33.665	34.0
CTD	SHODB542881	2012-11-08T00:01:00.0	31.963	34.048
CTD	SHODB542882	2012-11-12T00:22:00.0	31.699	34.132
CTD	SHODB542883	2012-11-16T00:07:00.0	31.492	34.026
CTD	SHODB542888	2012-12-06T00:17:00.0	31.881	34.131
CTD	SHODB542889	2012-12-09T23:55:00.0	31.778	34.326
CTD	SHODB542890	2012-12-14T00:20:00.0	31.761	34.43
CTD	SHODB542891	2012-12-18T00:01:00.0	31.767	34.488
CTD	SHODB542892	2012-12-22T00:18:00.0	31.75	34.512
CTD	SHODB542893	2012-12-26T00:13:00.0	31.694	34.47
CTD	SHODB542894	2012-12-30T00:17:00.0	31.58	34.44
CTD	SHODB542895	2013-01-03T00:10:00.0	31.493	34.516
CTD	SHODB542896	2013-01-07T00:18:00.0	31.419	34.531
CTD	SHODB542897	2013-01-10T23:59:00.0	31.464	34.56
CTD	SHODB542898	2013-01-15T00:13:00.0	31.543	34.569
CTD	SHODB542899	2013-01-19T00:15:00.0	31.514	34.533
CTD	SHODB542900	2013-01-23T00:24:00.0	31.43	34.608
CTD	SHODB542901	2013-01-26T23:58:00.0	31.38	34.76
CTD	SHODB542902	2013-01-31T00:24:00.0	31.392	34.906
CTD	SHODB542903	2013-02-04T23:49:00.0	31.425	34.985
CTD	SHODB542904	2013-02-08T00:24:00.0	31.443	35.062
CTD	SHODB542905	2013-02-11T23:47:00.0	31.468	35.113
CTD	SHODB542906	2013-02-16T00:21:00.0	31.597	35.251
CTD	SHODB542957	2013-09-11T23:03:00.0	31.308	35.372
CTD	SHODB542958	2013-09-15T23:08:00.0	31.206	35.202
CTD	SHODB542959	2013-09-19T23:15:00.0	31.061	35.198
CTD	SHODB542960	2013-09-23T23:19:00.0	30.99	35.232
CTD	SHODB542961	2013-09-27T23:32:00.0	30.864	35.356
CTD	SHODB542967	2013-10-22T00:28:00.0	30.651	35.38
CTD	SHODB543587	2012-10-14T10:50:00.0	35.453	34.712
CTD	SHODB543588	2012-10-19T10:50:00.0	35.405	34.65
CTD	SHODB543589	2012-10-29T10:56:00.0	34.919	34.489
CTD	SHODB543590	2012-11-08T10:16:00.0	34.934	34.641
CTD	SHODB543591	2012-11-18T09:05:00.0	34.489	34.332
CTD	SHODB543592	2012-12-03T10:01:00.0	34.685	34.534
CTD	SHODB543593	2012-12-13T10:11:00.0	34.828	34.634
CTD	SHODB543594	2012-12-23T10:40:00.0	35.022	34.548
CTD	SHODB543595	2012-12-28T10:52:00.0	34.918	34.476
CTD	SHODB543596	2013-01-02T10:51:00.0	35.079	34.397
CTD	SHODB543597	2013-01-12T10:43:00.0	35.202	34.603
CTD	SHODB543598	2013-01-17T10:45:00.0	35.139	34.496
CTD	SHODB543599	2013-01-22T11:27:00.0	35.375	34.636
CTD	SHODB543600	2013-02-06T10:07:00.0	35.378	35.019
CTD	SHODB543601	2013-02-16T08:38:00.0	35.735	35.086
CTD	SHODB543602	2013-02-21T09:05:00.0	35.718	34.935
CTD	SHODB543603	2013-02-26T07:11:00.0	35.779	34.876
CTD	SHODB543604	2013-03-03T07:30:00.0	35.769	34.865
CTD	SHODB543605	2013-03-08T09:57:00.0	35.65	34.844
CTD	SHODB543606	2013-03-18T09:58:00.0	35.634	34.623
CTD	SHODB543607	2013-03-23T09:02:00.0	35.583	34.406
CTD	SHODB543608	2013-03-28T09:49:00.0	35.637	34.54
CTD	SHODB543609	2013-04-02T08:33:00.0	35.669	34.701
CTD	SHODB543610	2013-04-07T10:06:00.0	35.656	34.806
CTD	SHODB543611	2013-04-12T07:36:00.0	35.766	34.813
CTD	SHODB543612	2013-04-22T08:14:00.0	35.749	34.903
CTD	SHODB543613	2013-04-27T08:32:00.0	35.777	35.057
CTD	SHODB543614	2013-05-02T08:31:00.0	35.809	35.099
CTD	SHODB543615	2013-05-07T07:17:00.0	35.809	35.078
CTD	SHODB543616	2013-05-12T06:42:00.0	35.841	35.056
CTD	SHODB543617	2013-06-26T08:01:00.0	35.842	35.153
CTD	SHODB543672	2012-10-05T00:01:00.0	32.111	34.1244
CTD	SHODB543673	2012-10-09T23:54:00.0	32.1251	34.28
CTD	SHODB543674	2012-10-15T00:01:00.0	32.1671	34.3424
CTD	SHODB543675	2012-10-20T00:05:00.0	32.2807	34.375
CTD	SHODB543676	2012-10-25T00:01:00.0	32.3963	34.4183
CTD	SHODB543677	2012-10-30T00:02:00.0	32.5689	34.3891
CTD	SHODB543678	2012-11-04T00:00:00.0	32.9523	34.213
CTD	SHODB543683	2012-11-29T00:06:00.0	32.7986	34.2371
CTD	SHODB543684	2012-12-03T23:59:00.0	33.1665	34.0841
CTD	SHODB544007	2012-09-22T08:01:00.0	27.992	34.238
CTD	SHODB544009	2012-09-30T08:19:00.0	28.856	34.008
CTD	SHODB544223	2011-10-04T14:18:00.0	32.092	34.498
CTD	SHODB544224	2011-10-14T14:42:00.0	32.128	34.832
CTD	SHODB544225	2011-10-29T14:49:00.0	31.824	35.053
CTD	SHODB544226	2011-11-08T15:29:00.0	31.445	35.106
CTD	SHODB544227	2011-11-13T14:18:00.0	31.372	35.012
CTD	SHODB544228	2011-11-18T13:58:00.0	31.329	34.958
CTD	SHODB544229	2011-11-28T15:16:00.0	31.484	34.867
CTD	SHODB544230	2011-12-03T14:34:00.0	31.623	34.908
CTD	SHODB544231	2011-12-08T15:53:00.0	31.834	34.977
CTD	SHODB544232	2011-12-13T13:56:00.0	31.918	34.977
CTD	SHODB544233	2011-12-18T15:13:00.0	31.915	34.89
CTD	SHODB544234	2011-12-23T13:56:00.0	31.911	34.981
CTD	SHODB544235	2011-12-28T15:12:00.0	31.915	35.071
CTD	SHODB544236	2012-01-02T13:48:00.0	31.991	35.236
CTD	SHODB544237	2012-01-07T15:28:00.0	32.048	35.37
CTD	SHODB544254	2012-05-16T14:14:00.0	27.852	35.378
CTD	SHODB544255	2012-05-21T13:39:00.0	27.738	35.314
CTD	SHODB544256	2012-05-26T12:55:00.0	27.691	35.302
CTD	SHODB544257	2012-05-31T13:18:00.0	27.549	35.205
CTD	SHODB544258	2012-06-05T13:02:00.0	27.611	35.15
CTD	SHODB544259	2012-06-10T13:04:00.0	27.592	35.155
CTD	SHODB544260	2012-06-15T13:22:00.0	27.525	35.196
CTD	SHODB544261	2012-06-20T12:48:00.0	27.39	35.158
CTD	SHODB544262	2012-06-25T14:34:00.0	27.337	35.084
CTD	SHODB544263	2012-06-30T14:54:00.0	27.192	35.15
CTD	SHODB544264	2012-07-05T12:44:00.0	27.008	35.111
CTD	SHODB544265	2012-07-10T12:46:00.0	26.803	35.011
CTD	SHODB544266	2012-07-15T13:17:00.0	26.629	34.823
CTD	SHODB544267	2012-07-20T13:03:00.0	26.519	34.487
CTD	SHODB544268	2012-07-25T13:04:00.0	26.37	34.189
CTD	SHODB544269	2012-07-30T13:14:00.0	26.175	34.078
CTD	SHODB544541	2011-10-09T01:28:00.0	27.946	34.613
CTD	SHODB544542	2011-10-14T02:03:00.0	27.929	34.608
CTD	SHODB544543	2011-10-19T01:22:00.0	27.863	34.695
CTD	SHODB544544	2011-10-29T00:53:00.0	27.82	34.781
CTD	SHODB544545	2011-11-13T03:02:00.0	27.746	34.753
CTD	SHODB544546	2011-11-23T02:18:00.0	27.488	34.524
CTD	SHODB544547	2011-11-28T01:03:00.0	27.599	34.366
CTD	SHODB544548	2011-12-28T01:32:00.0	27.232	34.223
CTD	SHODB544549	2012-01-07T01:28:00.0	27.114	34.137
CTD	SHODB544592	2011-10-09T10:56:00.0	33.919	34.231
CTD	SHODB544612	2012-03-08T09:00:00.0	33.206	34.089
CTD	SHODB544613	2012-03-13T10:22:00.0	33.334	34.325
CTD	SHODB544614	2012-03-18T07:42:00.0	33.38	34.478
CTD	SHODB544615	2012-03-23T07:37:00.0	33.385	34.531
CTD	SHODB544616	2012-03-28T07:33:00.0	33.349	34.551
CTD	SHODB544617	2012-04-02T07:37:00.0	33.363	34.584
CTD	SHODB544618	2012-04-07T07:16:00.0	33.297	34.526
CTD	SHODB544619	2012-04-12T06:52:00.0	33.209	34.561
CTD	SHODB544620	2012-04-17T07:25:00.0	33.291	34.547
CTD	SHODB544621	2012-04-22T07:37:00.0	33.348	34.602
CTD	SHODB544622	2012-04-27T07:56:00.0	33.549	34.572
CTD	SHODB544623	2012-05-12T09:57:00.0	34.169	34.547
CTD	SHODB544624	2012-05-17T10:02:00.0	34.208	34.436
CTD	SHODB544625	2012-05-22T09:07:00.0	34.252	34.331
CTD	SHODB544626	2012-06-01T09:16:00.0	34.532	34.243
CTD	SHODB544627	2012-06-06T09:25:00.0	34.576	34.103
CTD	SHODB544629	2012-07-01T10:10:00.0	34.149	34.557
CTD	SHODB544630	2012-07-11T10:03:00.0	34.416	34.603
CTD	SHODB544631	2012-07-16T09:56:00.0	34.495	34.487
CTD	SHODB544632	2012-07-26T11:15:00.0	35.02	34.965
CTD	SHODB544633	2012-07-31T10:44:00.0	35.555	34.844
CTD	SHODB544634	2012-08-05T10:22:00.0	35.172	34.779
CTD	SHODB544635	2012-08-10T10:43:00.0	35.275	34.717
CTD	SHODB544636	2012-08-15T10:21:00.0	35.15	34.864
CTD	SHODB544637	2012-08-20T10:18:00.0	35.315	34.938
CTD	SHODB544638	2012-08-30T10:21:00.0	35.078	34.856
CTD	SHODB544639	2012-09-04T10:03:00.0	35.345	34.824
CTD	SHODB544640	2012-09-09T10:30:00.0	34.948	34.899
CTD	SHODB544641	2012-09-14T10:28:00.0	35.468	34.872
CTD	SHODB544642	2012-09-19T11:15:00.0	35.41	34.663
CTD	SHODB544755	2012-04-05T04:49:00.0	26.17	34.181
CTD	SHODB544756	2012-04-11T00:44:00.0	26.378	34.521
CTD	SHODB544757	2012-04-15T23:56:00.0	26.681	34.653
CTD	SHODB544758	2012-04-21T02:52:00.0	26.693	34.562
CTD	SHODB544759	2012-04-25T23:44:00.0	26.379	34.549
CTD	SHODB544760	2012-04-30T23:32:00.0	26.218	34.545
CTD	SHODB544761	2012-05-06T02:55:00.0	26.043	34.423
CTD	SHODB544772	2012-05-04T05:34:00.0	33.526	34.498
CTD	SHODB544773	2012-05-09T05:54:00.0	34.089	34.099
CTD	lev1313_04	2000-02-15T11:51:00.00	34.80583	32.37683
CTD	lev1313_05	2000-02-15T13:50:00.00	34.71317	32.43983
CTD	lev131305a	2000-02-15T14:35:00.00	34.71317	32.44017
CTD	lev1313_06	2000-02-15T16:56:00.00	34.56767	32.47517
CTD	lev131306a	2000-02-15T18:16:00.00	34.5575	32.48517
CTD	lev131306b	2000-02-15T19:46:00.00	34.54167	32.50267
CTD	ME_March05M01	2005-03-22T08:47:00.00	34.58	32.18833
CTD	ME_March05m02	2005-03-22T13:00:00.00	34.60167	32.179
CTD	ME_March05m03	2005-03-22T14:52:00.00	34.76967	32.10683
CTD	ME_March05M04	2005-03-27T13:35:00.00	34.6415	32.16767
CTD	ME_March05M05	2005-03-27T15:01:00.00	34.76283	32.11033
CTD	ME_March05M06	2005-03-27T17:25:00.00	34.65217	32.163
CTD	ME_March05M07	2005-03-27T18:42:00.00	34.75433	32.11317
CTD	ME_March05M08	2005-03-30T08:37:00.00	34.65983	32.15783
CTD	ME_March05M09	2005-03-30T09:57:00.00	34.77083	32.10567
CTD	ME_March05M10	2005-03-30T12:40:00.00	34.67433	32.1505
CTD	ME_March05M11	2005-03-30T13:55:00.00	34.74517	32.11767
CTD	ME_March05M12	2005-04-10T08:03:00.00	34.69083	32.14067
CTD	ME_March05M13	2005-04-10T09:16:00.00	34.76933	32.106
CTD	ME_March05M14	2005-04-10T11:40:00.00	34.731	32.1225
CTD	ME_March05M15	2005-04-10T12:50:00.00	34.65867	32.1565
CTD	HaiSec02S01	2003-01-07T20:48:00.00	33.00033	33.2485
CTD	HaiSec02S02	2003-01-07T22:13:00.00	32.83417	33.24883
CTD	HaiSec02S03	2003-01-07T23:45:00.00	32.6675	33.25033
CTD	HaiSec02S04	2003-01-08T01:17:00.00	32.49833	33.25067
CTD	HaiSec02S05	2003-01-08T02:53:00.00	32.33233	33.249
CTD	HaiSec02S06	2003-01-08T04:28:00.00	32.16783	33.24866
CTD	HaiSec02S07	2003-01-08T06:09:00.00	31.99967	33.24983
CTD	HaiSec02S08	2003-01-08T07:46:00.00	31.83483	33.24917
CTD	HaiSec02S09	2003-01-08T09:23:00.00	31.6675	33.25134
CTD	HaiSec02S10	2003-01-08T11:03:00.00	31.50217	33.25
CTD	HaiSec02S11	2003-01-08T17:52:00.00	31.832	33.08333
CTD	HaiSec02S12	2003-01-08T20:12:00.00	32.16683	33.08267
CTD	HaiSec02S13	2003-01-09T05:39:00.00	33.33333	33.25183
CTD	HaiSec02S14	2003-01-09T08:57:00.00	33.66633	33.2495
CTD	HaiSec02H06	2003-01-09T13:07:00.00	34.16367	33.15017
CTD	HaiSec02H05	2003-01-09T16:33:00.00	34.49933	32.99967
CTD	HaiSec02H04	2003-01-09T19:33:00.00	34.749	32.951
CTD	HaiSec02H03	2003-01-09T21:23:00.00	34.84917	32.93333
CTD	HaiSec02H02	2003-01-09T22:41:00.00	34.88367	32.9165
CTD	HaiSec02H01	2003-01-09T23:33:00.00	34.916	32.899
CTD	HaiSec03H01	2003-04-07T06:48:00.00	34.9175	32.88817
CTD	HaiSec03H02	2003-04-07T07:52:00.00	34.884	32.91617
CTD	HaiSec03H03	2003-04-07T08:44:00.00	34.87217	32.922
CTD	HaiSec03H04	2003-04-07T11:06:00.00	34.75633	32.94867
CTD	HaiSec03H05	2003-04-07T14:08:00.00	34.513	32.99817
CTD	HaiSec03H06	2003-04-07T17:59:00.00	34.16083	33.15117
CTD	HaiSec03H06A	2003-04-07T20:04:00.00	34.11483	33.15033
CTD	HaiSec04H01	2003-05-25T10:53:00.00	34.91733	32.90217
CTD	HaiSec04H02	2003-05-25T12:59:00.00	34.886	32.91633
CTD	HaiSec04H03	2003-05-25T14:21:00.00	34.8855	32.93383
CTD	HaiSec04H04	2003-05-25T16:12:00.00	34.75017	32.95
CTD	HaiSec04H05	2003-05-25T19:25:00.00	34.5	32.99833
CTD	HaiSec04H06	2003-05-25T23:07:00.00	34.16167	33.15383
CTD	HaiSec04S01	2003-05-26T06:29:00.00	33.16667	33.00033
CTD	HaiSec04S03	2003-05-26T10:33:00.00	32.83367	33.00233
CTD	HaiSec04S05	2003-05-26T14:43:00.00	32.502	33.00083
CTD	HaiSec04S04	2003-05-26T16:37:00.00	32.668	32.9995
CTD	HaiSec04S20	2003-05-26T18:42:00.00	32.67417	33.1665
CTD	HaiSec04S21	2003-05-26T20:23:00.00	32.87117	33.1645
CTD	HaiSec04S22	2003-05-26T23:17:00.00	32.5015	33.25017
CTD	HaiSec04S07	2003-05-27T02:34:00.00	32.17067	33.0005
CTD	HaiSec04S06	2003-05-27T06:02:00.00	32.3315	33.001
CTD	HaiSec04S03-B	2003-05-27T09:28:00.00	32.834	33.0005
CTD	HaiSec04S02	2003-05-27T12:31:00.00	33.0005	32.99983
CTD	HaiSec04S02-B	2003-05-27T13:35:00.00	33.06816	32.999
CTD	HaiSec04H07	2003-05-27T18:04:00.00	33.66667	33.249
CTD	HaiSec05H01	2003-08-27T08:42:00.00	34.90067	32.89817
CTD	HaiSec05H02	2003-08-27T10:11:00.00	34.88233	32.917
CTD	HaiSec05H03	2003-08-27T11:28:00.00	34.85083	32.93417
CTD	HaiSec05H04	2003-08-27T12:46:00.00	34.751	32.95083
CTD	HaiSec05H05	2003-08-27T16:56:00.00	34.50083	33.0005
CTD	HaiSec05H06	2003-08-27T22:01:00.00	34.16267	33.15267
CTD	HaiSec06H01	2004-02-29T10:59:00.00	34.917	32.8995
CTD	HaiSec06H02	2004-02-29T12:04:00.00	34.878	32.911
CTD	HaiSec06H03	2004-02-29T14:03:00.00	34.86333	32.92583
CTD	HaiSec06H04	2004-02-29T16:12:00.00	34.745	32.94767
CTD	HaiSec06H05	2004-02-29T19:29:00.00	34.53633	33.00383
CTD	HaiSec06H06	2004-02-29T23:34:00.00	34.15833	33.14633
CTD	HaiSec07H01	2004-06-22T07:49:00.00	34.9215	32.90017
CTD	HaiSec07H02	2004-06-22T08:32:00.00	34.8845	32.9195
CTD	HaiSec07H03	2004-06-22T09:30:00.00	34.85433	32.93783
CTD	HaiSec07H04	2004-06-22T11:33:00.00	34.7525	32.95367
CTD	HaiSec07H05	2004-06-22T14:20:00.00	34.53817	32.99883
CTD	HaiSec07H06	2004-06-22T19:46:00.00	34.16567	33.14983
CTD	HaiSec08H01	2004-09-06T08:29:00.00	34.91683	32.9015
CTD	HaiSec08H02	2004-09-06T09:20:00.00	34.88783	32.92333
CTD	HaiSec08H03	2004-09-06T10:15:00.00	34.85033	32.9355
CTD	HaiSec08H04	2004-09-06T12:09:00.00	34.7515	32.95167
CTD	HaiSec08H05	2004-09-06T14:46:00.00	34.49917	33.0
CTD	HaiSec08H06	2004-09-06T19:03:00.00	34.161	33.15117
CTD	HaiSec10H01	2005-03-28T12:10:00.00	34.92033	32.902
CTD	HaiSec10H02	2005-03-28T13:11:00.00	34.888	32.91983
CTD	HaiSec10H03	2005-03-28T13:56:00.00	34.85	32.93467
CTD	HaiSec10H04	2005-03-28T15:14:00.00	34.74733	32.95167
CTD	HaiSec10H05	2005-03-28T18:02:00.00	34.501	32.99883
CTD	HaiSec10H06	2005-03-28T21:27:00.00	34.16283	33.151
CTD	HaiSec11H01	2005-06-28T07:58:00.00	34.9185	32.90166
CTD	HaiSec11H02	2005-06-28T08:33:00.00	34.88217	32.91683
CTD	HaiSec11H03	2005-06-28T09:56:00.00	34.84967	32.93417
CTD	HaiSec11H04	2005-06-28T11:19:00.00	34.743	32.9475
CTD	HaiSec11H05	2005-06-28T13:58:00.00	34.50183	32.9985
CTD	HaiSec11H06	2005-06-28T18:01:00.00	34.16183	33.15083
CTD	HaiSec09H01	2005-01-30T16:11:00.00	34.92216	32.89933
CTD	HaiSec09H02	2005-01-30T17:23:00.00	34.88633	32.91883
CTD	HaiSec09H03	2005-01-30T18:13:00.00	34.85217	32.93483
CTD	HaiSec09H04	2005-01-30T19:45:00.00	34.75333	32.95117
CTD	HaiSec09H05	2005-01-30T23:39:00.00	34.50467	32.99883
CTD	HaiSec12H01	2005-09-27T07:26:00.00	34.9175	32.89833
CTD	HaiSec12H02	2005-09-27T10:04:00.00	34.871	32.91883
CTD	HaiSec12H04	2005-09-27T10:06:00.00	34.76417	32.932
CTD	HaiSec12H03	2005-09-27T10:39:00.00	34.86183	32.91617
CTD	HaiSec12H05	2005-09-27T12:33:00.00	34.51534	32.99933
CTD	HaiSec12H06	2005-09-27T15:18:00.00	34.25083	32.99983
CTD	HaiSec12H07	2005-09-27T17:47:00.00	34.00217	32.99983
CTD	HaiSec12H08	2005-09-27T21:02:00.00	33.75183	32.99983
CTD	HaiSec13H01	2006-01-10T09:24:00.00	34.92017	32.9025
CTD	HaiSec13H02	2006-01-10T10:12:00.00	34.88233	32.917
CTD	HaiSec13H03	2006-01-10T11:04:00.00	34.86467	32.91317
CTD	HaiSec13H04	2006-01-10T13:08:00.00	34.77117	32.93267
CTD	HaiSec13H05	2006-01-10T16:28:00.00	34.52567	33.00117
CTD	HaiSec13H06	2006-01-10T21:57:00.00	34.2415	33.18733
CTD	HaiSec14H01	2006-03-23T09:17:00.00	34.92067	32.90583
CTD	HaiSec14H02	2006-03-23T09:58:00.00	34.88066	32.91683
CTD	HaiSec14H03	2006-03-23T10:37:00.00	34.86883	32.91417
CTD	HaiSec14H04	2006-03-23T11:54:00.00	34.77033	32.9335
CTD	HaiSec14H05	2006-03-23T15:25:00.00	34.51433	33.00033
CTD	HaiSec14H06	2006-03-23T20:27:00.00	34.00217	33.0005
CTD	HaiSec15H01	2006-07-11T09:05:00.00	34.9195	32.91117
CTD	HaiSec15H02	2006-07-11T10:02:00.00	34.882	32.9175
CTD	HaiSec15H03	2006-07-11T10:53:00.00	34.85433	32.9195
CTD	HaiSec15H04	2006-07-11T12:22:00.00	34.75733	32.94633
CTD	HaiSec15H05	2006-07-11T15:00:00.00	34.50017	32.9995
CTD	HaiSec15H06	2006-07-11T19:14:00.00	34.14233	33.147
CTD	HaiSec16H01	2006-09-18T08:11:00.00	34.91667	32.90117
CTD	HaiSec16H01A	2006-09-18T08:39:00.00	34.89017	32.91267
CTD	HaiSec16H02	2006-09-18T09:00:00.00	34.88467	32.91683
CTD	HaiSec16H02A	2006-09-18T09:23:00.00	34.8805	32.91833
CTD	HaiSec16H02B	2006-09-18T10:12:00.00	34.87217	32.91783
CTD	HaiSec16H03	2006-09-18T10:55:00.00	34.85017	32.9355
CTD	HaiSec16H04	2006-09-18T12:02:00.00	34.75633	32.94417
CTD	HaiSec16H05	2006-09-18T14:48:00.00	34.50033	32.99883
CTD	HaiSec16H06	2006-09-18T18:28:00.00	34.14734	33.14767
CTD	HaiSec17H01	2007-02-19T10:26:00.00	34.91933	32.88967
CTD	HaiSec17H02	2007-02-19T11:35:00.00	34.88117	32.90933
CTD	HaiSec17H04	2007-02-19T12:00:00.00	34.74217	32.94217
CTD	HaiSec17H03	2007-02-19T12:20:00.00	34.8505	32.93967
CTD	HaiSec17H05	2007-02-19T14:42:00.00	34.50183	33.001
CTD	HaiSec17H06	2007-02-19T18:57:00.00	34.1625	33.14867
CTD	HaiSec18H01	2007-07-03T08:11:00.00	34.92033	32.903
CTD	HaiSec18H02	2007-07-03T09:03:00.00	34.88117	32.9215
CTD	HaiSec18H03	2007-07-03T09:50:00.00	34.8495	32.93917
CTD	HaiSec18H04	2007-07-03T11:30:00.00	34.75667	32.948
CTD	HaiSec18H05	2007-07-03T14:45:00.00	34.49983	33.0005
CTD	HaiSec18H06	2007-07-03T18:58:00.00	34.1435	33.15033
CTD	HaiSec01H01	2002-08-19T08:37:00.00	34.92367	32.89383
CTD	HaiSec01H02	2002-08-19T09:50:00.00	34.878	32.90867
CTD	HaiSec01H03	2002-08-19T12:02:00.00	34.84733	32.93683
CTD	HaiSec01H04	2002-08-19T13:50:00.00	34.745	32.944
CTD	HaiSec01H05	2002-08-19T17:17:00.00	34.5035	32.9975
CTD	HaiSec01H06	2002-08-19T21:32:00.00	34.16117	33.15167
CTD	HaiSec19H01	2007-09-17T08:42:00.00	34.925	32.89783
CTD	HaiSec19H02	2007-09-17T14:27:00.00	34.8835	32.91783
CTD	HaiSec19H03	2007-09-17T15:17:00.00	34.85067	32.9365
CTD	HaiSec19H05	2007-09-17T20:50:00.00	34.49866	33.00017
CTD	HaiSec19H04	2007-09-17T18:00:00.00	34.756	32.94617
CTD	HaiSec20H01	2008-03-23T11:03:00.00	34.91817	32.9015
CTD	HaiSec20H02	2008-03-23T12:02:00.00	34.88	32.91883
CTD	HaiSec20H03	2008-03-23T12:45:00.00	34.84917	32.94083
CTD	HaiSec20H04	2008-03-23T14:10:00.00	34.755	32.948
CTD	HaiSec20H05	2008-03-23T17:22:00.00	34.49267	32.99733
CTD	HaiSec20H06	2008-03-23T20:47:00.00	34.14533	33.14734
CTD	HaiSec21H01	2008-08-28T07:43:00.00	34.91733	32.90083
CTD	HaiSec21H02	2008-08-28T09:05:00.00	34.88117	32.91967
CTD	HaiSec21H03	2008-08-28T09:57:00.00	34.85033	32.937
CTD	HaiSec21H04	2008-08-28T11:22:00.00	34.7575	32.9465
CTD	SESIL01H05	2008-04-08T10:48:00.00	34.502	33.00017
CTD	SESIL01H06	2008-04-08T14:33:00.00	34.14533	33.14817
CTD	SESIL01IL003	2008-04-08T22:45:00.00	33.49833	33.19183
CTD	SESIL01IL004	2008-04-09T03:28:00.00	33.0005	33.24434
CTD	SESIL01IL005	2008-04-09T08:13:00.00	32.502	33.289
CTD	SESIL01IL006	2008-04-09T12:51:00.00	32.00117	33.33817
CTD	SESIL01IL007	2008-04-09T17:30:00.00	31.49833	33.38483
CTD	SESIL01IL008	2008-04-09T23:00:00.00	30.99767	33.43517
CTD	SESIL02H05	2008-09-07T13:56:00.00	34.49817	33.0025
CTD	SESIL02H06	2008-09-07T17:44:00.00	34.14183	33.15017
CTD	SESIL02H150	2008-09-07T08:57:00.00	34.86717	32.893
CTD	SESIL02IL003	2008-09-08T01:27:00.00	33.50083	33.19567
CTD	SESIL02IL004	2008-09-08T06:52:00.00	33.0	33.244
CTD	SESIL02IL005	2008-09-08T13:50:00.00	32.49983	33.29183
CTD	SESIL02IL006	2008-09-08T18:48:00.00	32.00083	33.33867
CTD	SESIL02IL007	2008-09-08T23:19:00.00	31.501	33.38417
CTD	SESIL02IL008	2008-09-09T05:35:00.00	31.0005	33.43083
CTD	SESIL02IL009	2008-09-09T11:51:00.00	30.49167	33.48167
CTD	SESIL02IL010	2008-09-09T18:24:00.00	30.00017	33.52483
CTD	SESIL02IL011	2008-09-10T01:22:00.00	29.50067	33.57233
CTD	SESIL02IL012	2008-09-10T07:32:00.00	28.999	33.622
CTD	SESIL02IL013	2008-09-10T14:32:00.00	28.4995	33.66833
CTD	SESIL02IL014	2008-09-11T01:23:00.00	28.00117	33.7205
CTD	SESIL02IL015	2008-09-11T07:32:00.00	27.5015	33.76317
CTD	SESIL02IL016	2008-09-11T13:13:00.00	27.00117	33.81
CTD	SESIL02IL017	2008-09-11T18:52:00.00	26.50033	33.85817
CTD	SESIL02IL018	2008-09-11T23:21:00.00	25.99933	33.9045
CTD	SESIL02IL019	2008-09-12T03:55:00.00	25.4985	33.95417
CTD	SESIL02IL020	2008-09-12T08:16:00.00	25.00033	34.00134
CTD	Michmoret_College_2012_D3M270	2012-05-07T16:42:00.00	34.57153	32.22887
CTD	Michmoret_College_2012_D4M270	2012-05-07T20:50:00.00	34.5702	32.23151
CTD	Michmoret_College_2012_D1M270	2012-05-07T08:57:00.00	34.5631	32.2281
CTD	Michmoret_College_2012_E4M270	2012-05-14T20:50:00.00	34.56989	32.23087
CTD	Michmoret_College_2012_E3M270	2012-05-14T16:55:00.00	34.57163	32.2258
CTD	Michmoret_College_2012_C4M270	2012-03-26T21:00:00.00	34.58	32.24
CTD	Michmoret_College_2012_E2M270	2012-05-14T12:40:00.00	34.57	32.23
CTD	Michmoret_College_2012_C5M270	2012-03-27T00:55:00.00	34.56865	32.23474
CTD	Michmoret_College_2012_C1M270	2012-03-26T08:45:00.00	34.56667	32.22733
CTD	Michmoret_College_2012_F1M270	2012-05-28T08:55:00.00	34.57369	32.23234
CTD	Michmoret_College_2012_C2M270	2012-03-26T12:55:00.00	34.56865	32.23474
CTD	Michmoret_College_2012_F2M270	2012-05-28T12:55:00.00	34.57837	32.2515
CTD	Michmoret_College_2013_A1M300	2013-03-11T08:45:00.00	34.55205	32.21893
CTD	Michmoret_College_2013_C4M270	2013-04-29T20:45:00.00	34.57036	32.23221
CTD	Michmoret_College_2013_A2M270	2013-03-11T12:50:00.00	34.56468	32.22053
CTD	Michmoret_College_2013_C3M27	2013-04-29T16:49:00.00	34.56412	32.21232
CTD	Michmoret_College_2013_A3M270	2013-03-11T16:50:00.00	34.56487	32.22183
CTD	Michmoret_College_2013_C2M250	2013-04-29T12:55:00.00	34.56876	32.21132
CTD	Michmoret_College_2013_A4M270	2013-03-11T20:45:00.00	34.56015	32.21581
CTD	Michmoret_College_2013_C1M270	2013-04-29T08:52:00.00	34.56322	32.21323
CTD	Michmoret_College_2013_D2M250	2013-05-13T13:05:00.00	34.57333	32.22
CTD	Michmoret_College_2013_B2M200	2013-04-11T12:45:00.00	34.59493	32.22567
CTD	Michmoret_College_2013_D1M300	2013-05-13T08:50:00.00	34.57036	32.23221
CTD	Michmoret_College_2013_B3M250	2013-04-11T16:50:00.00	34.5708	32.2203
CTD	Michmoret_College_2013_E2M270	2013-05-20T12:45:00.00	34.5642	32.2172
CTD	Michmoret_College_2013_B4M250	2013-04-11T20:55:00.00	34.565	32.216
CTD	Michmoret_College_2013_E1M270	2013-05-20T08:45:00.00	34.5697	32.2183
CTD	Michmoret_College_2009_1M210	2009-03-17T10:55:00.00	34.604	32.256
CTD	Michmoret_College_2009_1M210	2009-03-17T13:55:00.00	34.604	32.256
CTD	Michmoret_College_2009_1M210	2009-03-17T17:50:00.00	34.604	32.256
CTD	Michmoret_College_2009_1M210	2009-03-17T17:50:00.00	34.604	32.255
CTD	Michmoret_College_2009_2M270	2009-03-31T09:38:00.00	34.584	32.262
CTD	Michmoret_College_2009_2M200	2009-03-31T13:50:00.00	34.604	32.255
CTD	Michmoret_College_2009_2M270	2009-03-31T17:35:00.00	34.585	32.262
CTD	Michmoret_College_2009_2M270	2009-03-31T21:40:00.00	34.581	32.25
CTD	Michmoret_College_2009_3M260	2009-04-21T15:45:00.00	34.588	32.267
CTD	Michmoret_College_2009_3M270	2009-04-21T19:45:00.00	34.587	32.271
CTD	Michmoret_College_2009_3M270	2009-04-21T22:45:00.00	34.583	32.258
CTD	Michmoret_College_2009_4M250	2009-05-12T08:15:00.00	34.582	32.242
CTD	Michmoret_College_2009_4M270	2009-05-12T12:00:00.00	34.573	32.244
CTD	Michmoret_College_2009_4M270	2009-05-12T16:00:00.00	34.575	32.24
CTD	Michmoret_College_2009_4M270	2009-05-12T19:55:00.00	34.575	32.24
CTD	Michmoret_College_2009_4M270	2009-05-12T19:55:00.00	34.577	32.247
CTD	Michmoret_College_2009_4M270	2009-05-13T00:10:00.00	34.571	32.236
CTD	TARA_20091128ZTARA_20091203T2330Z_999_EVENT_CAST	2009-12-03T23:11:04	32.6722	33.5245
CTD	TARA_20091128ZTARA_20091204T0258Z_999_EVENT_CAST	2009-12-04T02:56:59	32.7209	33.649
CTD	TARA_20091128ZTARA_20091204T0909Z_027_EVENT_CAST	2009-12-04T08:59:06	32.9112	33.9258
CTD	TARA_20091128ZTARA_20091204T1303Z_999_EVENT_CAST	2009-12-04T12:59:07	32.895	34.0154
CTD	TARA_20091128ZTARA_20091204T1551Z_999_EVENT_CAST	2009-12-04T15:43:54	32.9046	34.133
CTD	TARA_20091128ZTARA_20091204T2030Z_028_EVENT_CAST	2009-12-04T20:26:06	32.9934	34.2886
CTD	TARA_20091128ZTARA_20091205T0246Z_999_EVENT_CAST	2009-12-05T02:41:16	33.0285	33.9318
CTD	TARA_20091128ZTARA_20091205T0553Z_999_EVENT_CAST	2009-12-05T05:47:58	33.1981	33.9236
CTD	TARA_20091128ZTARA_20091205T1017Z_999_EVENT_CAST	2009-12-05T10:13:12	33.3687	33.9196
CTD	TARA_20091128ZTARA_20091205T1333Z_999_EVENT_CAST	2009-12-05T13:31:38	33.5253	33.9267
CTD	TARA_20091128ZTARA_20091206T0448Z_999_EVENT_CAST	2009-12-06T04:42:02	33.0265	34.4098
CTD	TARA_20091128ZTARA_20091209T1427Z_999_EVENT_CAST	2009-12-09T14:21:12	33.5685	34.1884
CTD	TARA_20091214ZTARA_20091214T1208Z_029_EVENT_CAST	2009-12-14T12:07:41	35.3334	33.9229
CTD	TARA_20091214ZTARA_20091215T1045Z_030_EVENT_CAST	2009-12-15T10:40:46	32.8944	33.9179
CTD	TARA_20091214ZTARA_20091215T1339Z_030_EVENT_CAST	2009-12-15T13:36:08	32.8261	33.9202
CTD	TARA_20091214ZTARA_20091215T1512Z_030_EVENT_CAST	2009-12-15T15:23:37	32.8002	33.9235
CTD	TARA_20091214ZTARA_20091215T1605Z_030_EVENT_CAST	2009-12-15T16:03:17	32.7848	33.9245
CTD	TARA_20091214ZTARA_20091215T1648Z_030_EVENT_CAST	2009-12-15T16:37:03	32.7683	33.9245
CTD	TARA_20091214ZTARA_20091215T1710Z_030_EVENT_CAST	2009-12-15T17:06:41	32.7433	33.9287
CTD	CYBO9D16	2000-05-05T11:30:00.000	33.0833	34.625
CTD	CYBO9E5a	2000-05-05T12:05:00.000	33.0833	34.583
CTD	CYBO9D17	2000-05-05T12:25:00.000	33.1667	34.625
CTD	CYBO9E6	2000-05-05T01:25:00.000	33.1667	34.583
CTD	CYBO9F9	2000-05-05T02:20:00.000	33.1667	34.5
CTD	CYBO9E7	2000-05-05T03:30:00.000	33.25	34.417
CTD	CYBO9F10	2000-05-05T04:10:00.000	33.3333	34.5
CTD	CYBO9E8	2000-05-05T05:25:00.000	33.3333	34.583
CTD	CYBO9D8a	2000-05-05T06:25:00.000	33.4167	34.692
CTD	CYBO9D10	2000-05-05T07:00:00.000	33.5	34.667
CTD	CYBO9E9	2000-05-05T07:30:00.000	33.5	34.583
CTD	CYBO9F12	2000-05-05T09:15:00.000	33.6667	34.5
CTD	CYBO9D11	2000-05-05T10:35:00.000	33.6667	34.667
CTD	CYBO9C6	2000-05-05T11:40:00.000	33.75	34.75
CTD	CYBO9B4	2000-05-06T12:50:00.000	33.6667	34.833
CTD	CYBO9A6a	2000-05-06T01:30:00.000	33.7567	34.892
CTD	CYBO9B6	2000-05-06T02:30:00.000	33.8333	34.833
CTD	CYBO9D12	2000-05-06T04:10:00.000	33.8333	34.667
CTD	CYBO9D13	2000-05-06T05:40:00.000	34.0	34.667
CTD	CYBO9C8	2000-05-06T06:45:00.000	34.0	34.75
CTD	CYBO9B7	2000-05-06T07:50:00.000	34.0	34.833
CTD	CYBO9A8	2000-05-06T08:55:00.000	34.0	34.917
CTD	CYBO9A9	2000-05-06T09:55:00.000	34.1667	34.917
CTD	CYBO9B8	2000-05-06T11:00:00.000	34.1667	34.833
CTD	CYBO9D14	2000-05-06T12:45:00.000	34.1667	34.667
CTD	CYBO9C10	2000-05-06T02:10:00.000	34.3333	34.75
CTD	CYBO9B9	2000-05-06T03:20:00.000	34.3333	34.833
CTD	CYBO9A12	2000-05-06T04:45:00.000	34.5	34.917
CTD	CYBO9C11	2000-05-06T06:25:00.000	34.6667	34.75
CTD	CYBO9F17	2000-05-06T08:25:00.000	34.6667	34.5
CTD	CYBO9F16	2000-05-06T10:35:00.000	34.3333	34.5
CTD	CYBO9H7	2000-05-07T12:50:00.000	34.5	34.25
CTD	CYBO9H6	2000-05-07T03:55:00.000	34.0	34.25
CTD	CYBO9F14	2000-05-07T05:50:00.000	34.0	34.5
CTD	CYBO9G7a	2000-05-07T07:30:00.000	33.8333	34.417
CTD	CYBO9H5	2000-05-07T10:00:00.000	33.5	34.25
CTD	CYBO9H4	2000-05-07T01:10:00.000	33.0	34.25
CTD	CYBO9H3	2000-05-07T04:35:00.000	32.5	34.25
CTD	CYBO9I4	2000-05-07T06:30:00.000	32.5	34.0
CTD	CYBO9I5	2000-05-07T09:30:00.000	33.0	34.0
CTD	CYBO9I6	2000-05-08T12:25:00.000	33.5	34.0
CTD	CYBO9I7	2000-05-08T03:20:00.000	34.0	34.0
CTD	CYBO9I8	2000-05-08T06:15:00.000	34.5	34.0
CTD	CYBO9J7	2000-05-08T09:40:00.000	34.5	33.5
CTD	CYBO9J6	2000-05-08T01:00:00.000	34.0	33.5
CTD	CYBO9J5	2000-05-08T03:55:00.000	33.5	33.5
CTD	CYBO9K4a	2000-05-08T07:15:00.000	33.0	33.25
CTD	CYBO9J4	2000-05-08T09:25:00.000	33.0	33.5
CTD	CYBO9J3	2000-05-09T01:00:00.000	32.5	33.5
CTD	CYBO9K2a	2000-05-09T04:00:00.000	32.0	33.25
CTD	CYBO9J2	2000-05-09T05:50:00.000	32.0	33.5
CTD	CYBO9J1	2000-05-09T08:00:00.000	31.5	33.5
CTD	CYBO9J0	2000-05-09T11:40:00.000	31.0	33.5
CTD	CYBO9I0	2000-05-09T03:50:00.000	30.5	34.0
CTD	CYBO9I1	2000-05-09T06:20:00.000	31.0	34.0
CTD	CYBO9F0	2000-05-09T09:45:00.000	31.0	34.5
CTD	CYBO9F01	2000-05-10T12:35:00.000	30.5	34.5
CTD	CYBO9A02	2000-05-10T03:50:00.000	30.5	35.0
CTD	CYBO9A01	2000-05-10T06:45:00.000	31.0	35.0
CTD	CYBO9A0	2000-05-10T09:35:00.000	31.5	35.0
CTD	CYBO9C1	2000-05-10T11:30:00.000	31.5	34.75
CTD	CYBO9F1	2000-05-10T01:15:00.000	31.5	34.5
CTD	CYBO9H1	2000-05-10T03:00:00.000	31.5	34.25
CTD	CYBO9I2	2000-05-10T04:50:00.000	31.5	34.0
CTD	CYBO9MAI2	2000-05-10T07:25:00.000	31.93	34.133
CTD	CYBO9H2	2000-05-10T09:10:00.000	32.0	34.25
CTD	CYBO9F2	2000-05-10T11:00:00.000	32.0	34.5
CTD	CYBO9D1	2000-05-11T12:30:00.000	32.0	34.667
CTD	CYBO9B1	2000-05-11T01:55:00.000	32.0	34.833
CTD	CYBO9A2	2000-05-11T03:30:00.000	32.0	35.0
CTD	CYBO9A1	2000-05-11T05:00:00.000	32.0	35.167
CTD	CYBO9A4	2000-05-11T06:25:00.000	32.1667	35.083
CTD	CYBO9A3	2000-05-11T08:00:00.000	32.1667	34.917
CTD	CYBO9B3	2000-05-11T09:10:00.000	32.25	34.833
CTD	CYBO9C2	2000-05-11T10:15:00.000	32.1667	34.75
CTD	CYBO9C3	2000-05-11T11:30:00.000	32.3333	34.75
CTD	CYBO9D3	2000-05-11T12:25:00.000	32.3333	34.667
CTD	CYBO9E1	2000-05-11T01:20:00.000	32.4167	34.583
CTD	CYBO9F3	2000-05-11T02:25:00.000	32.3333	34.5
CTD	CYBO9F4	2000-05-11T03:40:00.000	32.5	34.5
CTD	CYBO9E2	2000-05-11T04:55:00.000	32.5833	34.583
CTD	CYBO9F5	2000-05-11T05:50:00.000	32.6667	34.5
CTD	CYBO9E4	2000-05-11T07:50:00.000	32.8333	34.583
CTD	CYBO9F6	2000-05-11T08:40:00.000	32.8333	34.5
CTD	CYBO9G3a	2000-05-11T09:45:00.000	32.75	34.417
CTD	CYBO9G4a	2000-05-11T11:25:00.000	33.0	34.417
CTD	CYBO9F7	2000-05-12T12:30:00.000	33.0	34.5
CTD	CYBO10D16	2000-08-26T01:00:00.000	33.0833	34.625
CTD	CYBO10E5a	2000-08-26T01:30:00.000	33.0833	34.583
CTD	CYBO10D17	2000-08-26T02:10:00.000	33.1667	34.625
CTD	CYBO10E6	2000-08-26T02:45:00.000	33.1667	34.583
CTD	CYBO10F9	2000-08-26T03:35:00.000	33.1667	34.5
CTD	CYBO10E7	2000-08-26T04:35:00.000	33.25	34.417
CTD	CYBO10F10	2000-08-26T05:50:00.000	33.3333	34.5
CTD	CYBO10E8	2000-08-26T06:35:00.000	33.3333	34.583
CTD	CYBO10D8a	2000-08-26T07:35:00.000	33.4167	34.692
CTD	CYBO10D10	2000-08-26T08:10:00.000	33.5	34.667
CTD	CYBO10E9	2000-08-26T09:00:00.000	33.5	34.583
CTD	CYBO10F12	2000-08-26T10:15:00.000	33.6667	34.5
CTD	CYBO10D11	2000-08-26T11:35:00.000	33.6667	34.667
CTD	CYBO10C6	2000-08-27T12:40:00.000	33.75	34.75
CTD	CYBO10B4	2000-08-27T02:00:00.000	33.6667	34.833
CTD	CYBO10A6a	2000-08-27T02:40:00.000	33.7567	34.892
CTD	CYBO10B6	2000-08-27T03:30:00.000	33.8333	34.833
CTD	CYBO10D12	2000-08-27T05:05:00.000	33.8333	34.667
CTD	CYBO10D13	2000-08-27T08:00:00.000	34.0	34.667
CTD	CYBO10C8	2000-08-27T09:10:00.000	34.0	34.75
CTD	CYBO10B7	2000-08-27T10:05:00.000	34.0	34.833
CTD	CYBO10A8	2000-08-27T11:05:00.000	34.0	34.917
CTD	CYBO10A9	2000-08-27T12:05:00.000	34.1667	34.917
CTD	CYBO10B8	2000-08-27T01:00:00.000	34.1667	34.833
CTD	CYBO10D14	2000-08-27T02:35:00.000	34.1667	34.667
CTD	CYBO10C10	2000-08-27T04:00:00.000	34.3333	34.75
CTD	CYBO10B9	2000-08-27T05:10:00.000	34.3333	34.833
CTD	CYBO10A12	2000-08-27T06:35:00.000	34.5	34.917
CTD	CYBO10C11	2000-08-27T08:20:00.000	34.6667	34.75
CTD	CYBO10F17	2000-08-27T10:20:00.000	34.6667	34.5
CTD	CYBO10F16	2000-08-28T12:25:00.000	34.3333	34.5
CTD	CYBO10H7	2000-08-28T02:35:00.000	34.5	34.25
CTD	CYBO10H6	2000-08-28T05:30:00.000	34.0	34.25
CTD	CYBO10F14	2000-08-28T07:30:00.000	34.0	34.5
CTD	CYBO10G7a	2000-08-28T11:30:00.000	33.8333	34.417
CTD	CYBO10H5	2000-08-28T01:45:00.000	33.5	34.25
CTD	CYBO10H4	2000-08-28T04:40:00.000	33.0	34.25
CTD	CYBO10H3	2000-08-28T07:50:00.000	32.5	34.25
CTD	CYBO10I4	2000-08-28T09:40:00.000	32.5	34.0
CTD	CYBO10I5	2000-08-29T12:30:00.000	33.0	34.0
CTD	CYBO10I6	2000-08-29T03:15:00.000	33.5	34.0
CTD	CYBO10I7	2000-08-29T06:10:00.000	34.0	34.0
CTD	CYBO10I8	2000-08-29T09:00:00.000	34.5	34.0
CTD	CYBO10J7	2000-08-29T12:10:00.000	34.5	33.5
CTD	CYBO10J6	2000-08-29T03:25:00.000	34.0	33.5
CTD	CYBO10J5	2000-08-29T06:30:00.000	33.5	33.5
CTD	CYBO10K4a	2000-08-29T09:45:00.000	33.0	33.25
CTD	CYBO10J4	2000-08-29T11:45:00.000	33.0	33.5
CTD	CYBO10J3	2000-08-30T02:40:00.000	32.5	33.5
CTD	CYBO10K2a	2000-08-30T05:55:00.000	32.0	33.25
CTD	CYBO10J2	2000-08-30T07:45:00.000	32.0	33.5
CTD	CYBO10J1	2000-08-30T10:30:00.000	31.5	33.5
CTD	CYBO10J0	2000-08-30T01:35:00.000	31.0	33.5
CTD	CYBO10I0	2000-08-30T06:10:00.000	30.5	34.0
CTD	CYBO10I1	2000-08-30T09:15:00.000	31.0	34.0
CTD	CYBO10F0	2000-08-31T12:45:00.000	31.0	34.5
CTD	CYBO10F01	2000-08-31T03:40:00.000	30.5	34.5
CTD	CYBO10A02	2000-08-31T07:20:00.000	30.5	35.0
CTD	CYBO10A01	2000-08-31T10:15:00.000	31.0	35.0
CTD	CYBO10A0	2000-08-31T01:10:00.000	31.5	35.0
CTD	CYBO10C1	2000-08-31T03:00:00.000	31.5	34.75
CTD	CYBO10F1	2000-08-31T04:50:00.000	31.5	34.5
CTD	CYBO10H1	2000-08-31T06:45:00.000	31.5	34.25
CTD	CYBO10I2	2000-08-31T08:40:00.000	31.5	34.0
CTD	CYBO10MAI2	2000-08-31T11:25:00.000	31.93	34.133
CTD	CYBO10H2	2000-09-01T01:15:00.000	32.0	34.25
CTD	CYBO10F2	2000-09-01T03:10:00.000	32.0	34.5
CTD	CYBO10D1	2000-09-01T04:45:00.000	32.0	34.667
CTD	CYBO10B1	2000-09-01T06:15:00.000	32.0	34.833
CTD	CYBO10A2	2000-09-01T07:40:00.000	32.0	35.0
CTD	CYBO10A1	2000-09-01T09:10:00.000	32.0	35.167
CTD	CYBO10A4	2000-09-01T10:30:00.000	32.1667	35.083
CTD	CYBO10A3	2000-09-01T11:55:00.000	32.1667	34.917
CTD	CYBO10B3	2000-09-01T01:05:00.000	32.25	34.833
CTD	CYBO10C2	2000-09-01T02:10:00.000	32.1667	34.75
CTD	CYBO10C3	2000-09-01T03:20:00.000	32.3333	34.75
CTD	CYBO10D3	2000-09-01T04:15:00.000	32.3333	34.667
CTD	CYBO10E1	2000-09-01T05:05:00.000	32.4167	34.583
CTD	CYBO10F3	2000-09-01T06:20:00.000	32.3333	34.5
CTD	CYBO10F4	2000-09-01T07:40:00.000	32.5	34.5
CTD	CYBO10E2	2000-09-01T08:55:00.000	32.5833	34.583
CTD	CYBO10F5	2000-09-01T09:50:00.000	32.6667	34.5
CTD	CYBO10E4	2000-09-01T11:20:00.000	32.8333	34.583
CTD	CYBO10F6	2000-09-02T12:00:00.000	32.8333	34.5
CTD	CYBO10G3a	2000-09-02T01:05:00.000	32.75	34.417
CTD	CYBO10G4a	2000-09-02T02:40:00.000	33.0	34.417
CTD	CYBO10F7	2000-09-02T03:40:00.000	33.0	34.5
CTD	CYBO11D16	2001-04-06T09:30:00.000	33.0833	34.625
CTD	CYBO11E5a	2001-04-06T10:00:00.000	33.0833	34.583
CTD	CYBO11D17	2001-04-06T10:45:00.000	33.1667	34.625
CTD	CYBO11E6	2001-04-06T11:15:00.000	33.1667	34.583
CTD	CYBO11F9	2001-04-06T12:05:00.000	33.1667	34.5
CTD	CYBO11E7	2001-04-06T01:00:00.000	33.25	34.417
CTD	CYBO11F10	2001-04-06T02:05:00.000	33.3333	34.5
CTD	CYBO11E8	2001-04-06T02:50:00.000	33.3333	34.583
CTD	CYBO11D8a	2001-04-06T03:50:00.000	33.4167	34.692
CTD	CYBO11D10	2001-04-06T04:20:00.000	33.5	34.667
CTD	CYBO11E9	2001-04-06T05:10:00.000	33.5	34.583
CTD	CYBO11F12	2001-04-06T06:25:00.000	33.6667	34.5
CTD	CYBO11D11	2001-04-06T07:34:00.000	33.6667	34.667
CTD	CYBO11C6	2001-04-06T08:40:00.000	33.75	34.75
CTD	CYBO11B4	2001-04-06T09:46:00.000	33.6667	34.833
CTD	CYBO11A6a	2001-04-06T10:30:00.000	33.7567	34.892
CTD	CYBO11B6	2001-04-06T11:20:00.000	33.8333	34.833
CTD	CYBO11D12	2001-04-07T12:40:00.000	33.8333	34.667
CTD	CYBO11D13	2001-04-07T01:50:00.000	34.0	34.667
CTD	CYBO11C8	2001-04-07T02:50:00.000	34.0	34.75
CTD	CYBO11B7	2001-04-07T03:45:00.000	34.0	34.833
CTD	CYBO11A8	2001-04-07T04:45:00.000	34.0	34.917
CTD	CYBO11A9	2001-04-07T05:50:00.000	34.1667	34.917
CTD	CYBO11B8	2001-04-07T06:37:00.000	34.1667	34.833
CTD	CYBO11D14	2001-04-07T07:57:00.000	34.1667	34.667
CTD	CYBO11C10	2001-04-07T09:19:00.000	34.3333	34.75
CTD	CYBO11B9	2001-04-07T10:15:00.000	34.3333	34.833
CTD	CYBO11A12	2001-04-07T11:35:00.000	34.5	34.917
CTD	CYBO11C11	2001-04-07T01:15:00.000	34.6667	34.75
CTD	CYBO11F17	2001-04-07T03:00:00.000	34.6667	34.5
CTD	CYBO11F16	2001-04-07T04:54:00.000	34.3333	34.5
CTD	CYBO11H7	2001-04-07T06:52:00.000	34.5	34.25
CTD	CYBO11H6	2001-04-07T09:30:00.000	34.0	34.25
CTD	CYBO11F14	2001-04-07T11:15:00.000	34.0	34.5
CTD	CYBO11G7a	2001-04-08T12:25:00.000	33.8333	34.417
CTD	CYBO11H5	2001-04-08T02:40:00.000	33.5	34.25
CTD	CYBO11H4	2001-04-08T05:20:00.000	33.0	34.25
CTD	CYBO11H3	2001-04-08T08:02:00.000	32.5	34.25
CTD	CYBO11I4	2001-04-08T09:55:00.000	32.5	34.0
CTD	CYBO11I5	2001-04-08T12:30:00.000	33.0	34.0
CTD	CYBO11I6	2001-04-08T03:05:00.000	33.5	34.0
CTD	CYBO11I7	2001-04-08T05:42:00.000	34.0	34.0
CTD	CYBO11I8	2001-04-08T08:16:00.000	34.5	34.0
CTD	CYBO11J7	2001-04-08T11:25:00.000	34.5	33.5
CTD	CYBO11J6	2001-04-09T02:10:00.000	34.0	33.5
CTD	CYBO11J5	2001-04-09T04:49:00.000	33.5	33.5
CTD	CYBO11K4a	2001-04-09T07:50:00.000	33.0	33.25
CTD	CYBO11J4	2001-04-09T09:35:00.000	33.0	33.5
CTD	CYBO11J3	2001-04-09T12:25:00.000	32.5	33.5
CTD	CYBO11K2a	2001-04-09T03:30:00.000	32.0	33.25
CTD	CYBO11J2	2001-04-09T05:16:00.000	32.0	33.5
CTD	CYBO11J1	2001-04-09T07:52:00.000	31.5	33.5
CTD	CYBO11I2	2001-04-09T10:55:00.000	31.5	34.0
CTD	CYBO11I3	2001-04-10T01:45:00.000	32.0	34.0
CTD	CYBO11MAI2	2001-04-10T02:55:00.000	31.93	34.133
CTD	CYBO11H2	2001-04-10T04:34:00.000	32.0	34.25
CTD	CYBO11H1	2001-04-10T07:10:00.000	31.5	34.25
CTD	CYBO11F1	2001-04-10T08:53:00.000	31.5	34.5
CTD	CYBO11C1	2001-04-10T10:45:00.000	31.5	34.75
CTD	CYBO11A0	2001-04-10T12:45:00.000	31.5	35.0
CTD	CYBO11A1	2001-04-10T03:25:00.000	32.0	35.167
CTD	CYBO11A4	2001-04-10T04:42:00.000	32.1667	35.083
CTD	CYBO11A2	2001-04-10T06:04:00.000	32.0	35.0
CTD	CYBO11A3	2001-04-10T07:21:00.000	32.1667	34.917
CTD	CYBO11B3	2001-04-10T08:30:00.000	32.25	34.833
CTD	CYBO11C3	2001-04-10T09:36:00.000	32.3333	34.75
CTD	CYBO11D3	2001-04-10T10:25:00.000	32.3333	34.667
CTD	CYBO11C2	2001-04-10T11:25:00.000	32.1667	34.75
CTD	CYBO11B1	2001-04-11T01:05:00.000	32.0	34.833
CTD	CYBO11D1	2001-04-11T02:35:00.000	32.0	34.667
CTD	CYBO11F2	2001-04-11T04:05:00.000	32.0	34.5
CTD	CYBO11F3	2001-04-11T06:00:00.000	32.3333	34.5
CTD	CYBO11E1	2001-04-11T07:06:00.000	32.4167	34.583
CTD	CYBO11F4	2001-04-11T08:14:00.000	32.5	34.5
CTD	CYBO11E2	2001-04-11T09:16:00.000	32.5833	34.583
CTD	CYBO11F5	2001-04-11T10:12:00.000	32.6667	34.5
CTD	CYBO11G3a	2001-04-11T11:20:00.000	32.75	34.417
CTD	CYBO11F6	2001-04-11T12:35:00.000	32.8333	34.5
CTD	CYBO11E4	2001-04-11T01:15:00.000	32.8333	34.583
CTD	CYBO11G4a	2001-04-11T02:25:00.000	33.0	34.417
CTD	CYBO11F7	2001-04-11T03:25:00.000	33.0	34.5
CTD	CYBO12D16	2001-08-23T02:40:00.000	33.0833	34.625
CTD	CYBO12E5a	2001-08-23T03:10:00.000	33.0833	34.583
CTD	CYBO12D17	2001-08-23T03:50:00.000	33.1667	34.625
CTD	CYBO12E6	2001-08-23T04:25:00.000	33.1667	34.583
CTD	CYBO12F9	2001-08-23T05:20:00.000	33.1667	34.5
CTD	CYBO12E7	2001-08-23T06:25:00.000	33.25	34.417
CTD	CYBO12F10	2001-08-23T07:40:00.000	33.3333	34.5
CTD	CYBO12E8	2001-08-23T08:25:00.000	33.3333	34.583
CTD	CYBO12D8a	2001-08-23T09:30:00.000	33.4167	34.692
CTD	CYBO12D10	2001-08-23T10:00:00.000	33.5	34.667
CTD	CYBO12E9	2001-08-23T10:55:00.000	33.5	34.583
CTD	CYBO12F12	2001-08-24T12:01:00.000	33.6667	34.5
CTD	CYBO12D11	2001-08-24T01:30:00.000	33.6667	34.667
CTD	CYBO12C6	2001-08-24T02:35:00.000	33.75	34.75
CTD	CYBO12B4	2001-08-24T03:40:00.000	33.6667	34.833
CTD	CYBO12A6a	2001-08-24T04:25:00.000	33.7567	34.892
CTD	CYBO12B6	2001-08-24T05:30:00.000	33.8333	34.833
CTD	CYBO12D12	2001-08-24T07:00:00.000	33.8333	34.667
CTD	CYBO12D13	2001-08-24T08:15:00.000	34.0	34.667
CTD	CYBO12C8	2001-08-24T09:20:00.000	34.0	34.75
CTD	CYBO12B7	2001-08-24T10:25:00.000	34.0	34.833
CTD	CYBO12A8	2001-08-24T11:25:00.000	34.0	34.917
CTD	CYBO12A9	2001-08-24T12:35:00.000	34.1667	34.917
CTD	CYBO12B8	2001-08-24T01:25:00.000	34.1667	34.833
CTD	CYBO12D14	2001-08-24T03:00:00.000	34.1667	34.667
CTD	CYBO12C10	2001-08-24T04:25:00.000	34.3333	34.75
CTD	CYBO12B9	2001-08-24T05:25:00.000	34.3333	34.833
CTD	CYBO12A12	2001-08-24T06:50:00.000	34.5	34.917
CTD	CYBO12C11	2001-08-24T08:40:00.000	34.6667	34.75
CTD	CYBO12F17	2001-08-24T10:45:00.000	34.6667	34.5
CTD	CYBO12F16	2001-08-25T12:50:00.000	34.3333	34.5
CTD	CYBO12H7	2001-08-25T03:10:00.000	34.5	34.25
CTD	CYBO12H6	2001-08-25T06:10:00.000	34.0	34.25
CTD	CYBO12F14	2001-08-25T08:00:00.000	34.0	34.5
CTD	CYBO12G7a	2001-08-25T09:25:00.000	33.8333	34.417
CTD	CYBO12H5	2001-08-25T11:45:00.000	33.5	34.25
CTD	CYBO12H4	2001-08-25T02:45:00.000	33.0	34.25
CTD	CYBO12H3	2001-08-25T05:40:00.000	32.5	34.25
CTD	CYBO12I4	2001-08-25T07:40:00.000	32.5	34.0
CTD	CYBO12I5	2001-08-25T10:30:00.000	33.0	34.0
CTD	CYBO12I6	2001-08-26T01:15:00.000	33.5	34.0
CTD	CYBO12I7	2001-08-26T04:15:00.000	34.0	34.0
CTD	CYBO12I8	2001-08-26T07:10:00.000	34.5	34.0
CTD	CYBO12J7	2001-08-26T10:25:00.000	34.5	33.5
CTD	CYBO12J6	2001-08-26T01:15:00.000	34.0	33.5
CTD	CYBO12K6a	2001-08-26T03:10:00.000	34.0	33.25
CTD	CYBO12J5	2001-08-26T06:35:00.000	33.5	33.5
CTD	CYBO12K4b	2001-08-26T09:00:00.000	33.25	33.25
CTD	CYBO12K4d	2001-08-26T11:00:00.000	33.0	33.083
CTD	CYBO12K4a	2001-08-27T12:25:00.000	33.0	33.25
CTD	CYBO12J4	2001-08-27T02:25:00.000	33.0	33.5
CTD	CYBO12K4c	2001-08-27T04:50:00.000	32.75	33.25
CTD	CYBO12J3	2001-08-27T07:15:00.000	32.5	33.5
CTD	CYBO12K2a	2001-08-27T10:35:00.000	32.0	33.25
CTD	CYBO12J2	2001-08-27T12:30:00.000	32.0	33.5
CTD	CYBO12J1	2001-08-27T03:30:00.000	31.5	33.5
CTD	CYBO12J0	2001-08-27T06:40:00.000	31.0	33.5
CTD	CYBO12I1	2001-08-27T10:05:00.000	31.0	34.0
CTD	CYBO12F0	2001-08-28T01:20:00.000	31.0	34.5
CTD	CYBO12A01	2001-08-28T04:30:00.000	31.0	35.0
CTD	CYBO12A0	2001-08-28T07:20:00.000	31.5	35.0
CTD	CYBO12C1	2001-08-28T09:15:00.000	31.5	34.75
CTD	CYBO12F1	2001-08-28T11:10:00.000	31.5	34.5
CTD	CYBO12H1	2001-08-28T01:05:00.000	31.5	34.25
CTD	CYBO12I2	2001-08-28T03:05:00.000	31.5	34.0
CTD	CYBO12I3	2001-08-28T05:50:00.000	32.0	34.0
CTD	CYBO12MAI2	2001-08-28T07:20:00.000	31.93	34.133
CTD	CYBO12H2	2001-08-28T09:00:00.000	32.0	34.25
CTD	CYBO12F2	2001-08-28T11:05:00.000	32.0	34.5
CTD	CYBO12D1	2001-08-29T12:35:00.000	32.0	34.667
CTD	CYBO12B1	2001-08-29T02:10:00.000	32.0	34.833
CTD	CYBO12A2	2001-08-29T03:40:00.000	32.0	35.0
CTD	CYBO12A1	2001-08-29T05:10:00.000	32.0	35.167
CTD	CYBO12A4	2001-08-29T06:35:00.000	32.1667	35.083
CTD	CYBO12A3	2001-08-29T08:10:00.000	32.1667	34.917
CTD	CYBO12B3	2001-08-29T09:25:00.000	32.25	34.833
CTD	CYBO12C2	2001-08-29T10:30:00.000	32.1667	34.75
CTD	CYBO12C3	2001-08-29T11:40:00.000	32.3333	34.75
CTD	CYBO12D3	2001-08-29T12:30:00.000	32.3333	34.667
CTD	CYBO12E1	2001-08-29T01:25:00.000	32.4167	34.583
CTD	CYBO12F3	2001-08-29T02:35:00.000	32.3333	34.5
CTD	CYBO12F4	2001-08-29T03:55:00.000	32.5	34.5
CTD	CYBO12E2	2001-08-29T05:00:00.000	32.5833	34.583
CTD	CYBO12F5	2001-08-29T06:05:00.000	32.6667	34.5
CTD	CYBO12E4	2001-08-29T07:30:00.000	32.8333	34.583
CTD	CYBO12F6	2001-08-29T08:10:00.000	32.8333	34.5
CTD	CYBO12G3a	2001-08-29T09:05:00.000	32.75	34.417
CTD	CYBO12G4a	2001-08-29T10:35:00.000	33.0	34.417
CTD	CYBO12F7	2001-08-29T11:25:00.000	33.0	34.5
CTD	CYBO13D16	2002-03-24T02:35:00.000	33.0833	34.625
CTD	CYBO13E5a	2002-03-24T03:15:00.000	33.0833	34.583
CTD	CYBO13D17	2002-03-24T04:00:00.000	33.1667	34.617
CTD	CYBO13E6	2002-03-24T04:50:00.000	33.1667	34.583
CTD	CYBO13F9	2002-03-24T05:55:00.000	33.1667	34.5
CTD	CYBO13E7	2002-03-24T07:15:00.000	33.25	34.417
CTD	CYBO13F10	2002-03-24T08:35:00.000	33.3333	34.5
CTD	CYBO13E8	2002-03-24T09:30:00.000	33.3333	34.583
CTD	CYBO13D8a	2002-03-24T10:35:00.000	33.4167	34.692
CTD	CYBO13D10	2002-03-24T11:00:00.000	33.5	34.667
CTD	CYBO13E9	2002-03-25T12:15:00.000	33.5	34.583
CTD	CYBO13F12	2002-03-25T01:50:00.000	33.6667	34.5
CTD	CYBO13D11	2002-03-25T03:15:00.000	33.6667	34.667
CTD	CYBO13C6	2002-03-25T04:25:00.000	33.75	34.75
CTD	CYBO13B4	2002-03-25T06:05:00.000	33.6667	34.833
CTD	CYBO13A6a	2002-03-25T06:50:00.000	33.7567	34.892
CTD	CYBO13B6	2002-03-25T07:45:00.000	33.8333	34.833
CTD	CYBO13D12	2002-03-25T09:35:00.000	33.8333	34.667
CTD	CYBO13D13	2002-03-25T11:05:00.000	34.0	34.667
CTD	CYBO13C8	2002-03-25T12:20:00.000	34.0	34.75
CTD	CYBO13B7	2002-03-25T01:45:00.000	34.0	34.833
CTD	CYBO13A8	2002-03-25T02:50:00.000	34.0	34.917
CTD	CYBO13A9	2002-03-25T03:55:00.000	34.1667	34.917
CTD	CYBO13B8	2002-03-25T05:00:00.000	34.1667	34.833
CTD	CYBO13D14	2002-03-26T05:20:00.000	34.1667	34.667
CTD	CYBO13C10	2002-03-26T06:45:00.000	34.3333	34.75
CTD	CYBO13B9	2002-03-26T07:45:00.000	34.3333	34.833
CTD	CYBO13A12	2002-03-26T09:15:00.000	34.5	34.917
CTD	CYBO13C11	2002-03-26T11:05:00.000	34.6667	34.75
CTD	CYBO13F17	2002-03-26T02:10:00.000	34.6667	34.5
CTD	CYBO13F16	2002-03-26T05:15:00.000	34.3333	34.5
CTD	CYBO13H7	2002-03-26T07:35:00.000	34.5	34.283
CTD	CYBO13H6	2002-03-26T11:20:00.000	34.0	34.25
CTD	CYBO13F14	2002-03-27T01:15:00.000	34.0	34.5
CTD	CYBO13G7a	2002-03-27T02:50:00.000	33.8333	34.417
CTD	CYBO13H5	2002-03-27T05:30:00.000	33.5	34.25
CTD	CYBO13H4	2002-03-27T08:30:00.000	33.0	34.25
CTD	CYBO13H3	2002-03-27T11:20:00.000	32.5	34.25
CTD	CYBO13I5	2002-03-27T03:55:00.000	33.0	34.0
CTD	CYBO13I6	2002-03-27T06:30:00.000	33.5	34.0
CTD	CYBO13I7	2002-03-27T09:10:00.000	34.0	34.0
CTD	CYBO13I8	2002-03-27T11:55:00.000	34.5	34.0
CTD	CYBO13J7	2002-03-28T03:10:00.000	34.5	33.5
CTD	CYBO13J6	2002-03-28T06:15:00.000	34.0	33.5
CTD	CYBO13K6a	2002-03-28T08:15:00.000	34.0	33.25
CTD	CYBO13J5	2002-03-28T11:55:00.000	33.5	33.5
CTD	CYBO13K4b	2002-03-28T02:30:00.000	33.25	33.25
CTD	CYBO13K4d	2002-03-28T04:45:00.000	33.0	33.083
CTD	CYBO13K4a	2002-03-28T06:10:00.000	33.0	33.25
CTD	CYBO13J4	2002-03-28T08:05:00.000	33.0	33.5
CTD	CYBO13K4c	2002-03-28T10:45:00.000	32.75	33.25
CTD	CYBO13J3	2002-03-29T02:45:00.000	32.5	33.5
CTD	CYBO13K2a	2002-03-29T07:00:00.000	32.0	33.25
CTD	CYBO13J2	2002-03-29T09:30:00.000	32.0	33.5
CTD	CYBO13I2	2002-03-29T07:40:00.000	31.5	34.0
CTD	CYBO13I3	2002-03-29T10:15:00.000	32.0	34.0
CTD	CYBO13I3a	2002-03-29T11:55:00.000	32.25	34.0
CTD	CYBO13H2	2002-03-30T02:20:00.000	32.0	34.25
CTD	CYBO13H1	2002-03-30T05:20:00.000	31.5	34.25
CTD	CYBO13F1	2002-03-30T07:05:00.000	31.5	34.5
CTD	CYBO13C1	2002-03-30T08:55:00.000	31.5	34.75
CTD	CYBO13A0	2002-03-30T10:20:00.000	31.5	35.0
CTD	CYBO13A1	2002-03-30T01:30:00.000	32.0	35.167
CTD	CYBO13A4	2002-03-30T03:00:00.000	32.1667	35.083
CTD	CYBO13A2	2002-03-30T04:20:00.000	32.0	35.0
CTD	CYBO13A3	2002-03-30T06:50:00.000	32.1667	34.917
CTD	CYBO13B1	2002-03-30T07:10:00.000	32.0	34.833
CTD	CYBO13C2	2002-03-30T08:30:00.000	32.1667	34.75
CTD	CYBO13D1	2002-03-30T10:50:00.000	32.0	34.667
CTD	CYBO13F2	2002-03-31T12:20:00.000	32.0	34.5
CTD	CYBO13F3	2002-03-31T03:25:00.000	32.3333	34.5
CTD	CYBO13E1	2002-03-31T04:45:00.000	32.4167	34.583
CTD	CYBO13F4	2002-03-31T06:00:00.000	32.5	34.5
CTD	CYBO13F5	2002-03-31T07:30:00.000	32.6667	34.5
CTD	CYBO13G3a	2002-03-31T08:50:00.000	32.75	34.417
CTD	CYBO13F6	2002-03-31T10:15:00.000	32.8333	34.5
CTD	CYBO13G4C	2002-03-31T11:35:00.000	32.9533	34.433
CTD	CYBO14D16	2002-08-25T02:10:00.000	33.0833	34.625
CTD	CYBO14E5a	2002-08-25T02:30:00.000	33.0833	34.583
CTD	CYBO14D17	2002-08-25T03:15:00.000	33.1667	34.617
CTD	CYBO14E6	2002-08-25T03:40:00.000	33.1667	34.583
CTD	CYBO14F9	2002-08-25T04:30:00.000	33.1667	34.5
CTD	CYBO14E7	2002-08-25T05:30:00.000	33.25	34.417
CTD	CYBO14F10	2002-08-25T06:35:00.000	33.3333	34.5
CTD	CYBO14E8	2002-08-25T07:25:00.000	33.3333	34.583
CTD	CYBO14D8a	2002-08-25T08:30:00.000	33.4167	34.692
CTD	CYBO14D10	2002-08-25T09:05:00.000	33.5	34.667
CTD	CYBO14E9	2002-08-25T09:55:00.000	33.5	34.583
CTD	CYBO14F12	2002-08-25T11:05:00.000	33.6667	34.5
CTD	CYBO14D11	2002-08-26T12:10:00.000	33.6667	34.667
CTD	CYBO14C6	2002-08-26T01:10:00.000	33.75	34.75
CTD	CYBO14B4	2002-08-26T02:25:00.000	33.6667	34.833
CTD	CYBO14A6a	2002-08-26T03:10:00.000	33.7567	34.892
CTD	CYBO14B6	2002-08-26T04:05:00.000	33.8333	34.833
CTD	CYBO14D12	2002-08-26T05:30:00.000	33.8333	34.667
CTD	CYBO14D13	2002-08-26T06:45:00.000	34.0	34.667
CTD	CYBO14C8	2002-08-26T08:00:00.000	34.0	34.75
CTD	CYBO14B7	2002-08-26T09:00:00.000	34.0	34.833
CTD	CYBO14A8	2002-08-26T10:00:00.000	34.0	34.917
CTD	CYBO14A9	2002-08-26T11:10:00.000	34.1667	34.917
CTD	CYBO14B8	2002-08-26T12:00:00.000	34.1667	34.833
CTD	CYBO14D14	2002-08-26T01:25:00.000	34.1667	34.667
CTD	CYBO14C10	2002-08-26T02:50:00.000	34.3333	34.75
CTD	CYBO14B9	2002-08-26T03:50:00.000	34.3333	34.833
CTD	CYBO14A12	2002-08-26T05:05:00.000	34.5	34.917
CTD	CYBO14C11	2002-08-26T06:45:00.000	34.6667	34.75
CTD	CYBO14F17	2002-08-26T08:40:00.000	34.6667	34.5
CTD	CYBO14F16	2002-08-26T10:40:00.000	34.3333	34.5
CTD	CYBO14H7	2002-08-27T12:30:00.000	34.5	34.283
CTD	CYBO14H6	2002-08-27T03:20:00.000	34.0	34.25
CTD	CYBO14F14	2002-08-27T05:05:00.000	34.0	34.5
CTD	CYBO14G7a	2002-08-27T06:30:00.000	33.8333	34.417
CTD	CYBO14H5	2002-08-27T08:55:00.000	33.5	34.25
CTD	CYBO14H4	2002-08-27T11:40:00.000	33.0	34.25
CTD	CYBO14H3	2002-08-27T02:35:00.000	32.5	34.25
CTD	CYBO14I4	2002-08-27T04:25:00.000	32.5	34.0
CTD	CYBO14I5	2002-08-27T07:10:00.000	33.0	34.0
CTD	CYBO14I6	2002-08-27T09:40:00.000	33.5	34.0
CTD	CYBO14I7	2002-08-28T12:35:00.000	34.0	34.0
CTD	CYBO14I8	2002-08-28T03:20:00.000	34.5	34.0
CTD	CYBO14J7	2002-08-28T06:15:00.000	34.5	33.5
CTD	CYBO14J6	2002-08-28T09:00:00.000	34.0	33.5
CTD	CYBO14J5	2002-08-28T11:40:00.000	33.5	33.5
CTD	CYBO14K4a	2002-08-28T02:55:00.000	33.0	33.25
CTD	CYBO14J4	2002-08-28T04:55:00.000	33.0	33.5
CTD	CYBO14J3	2002-08-28T07:50:00.000	32.5	33.5
CTD	CYBO14K2a	2002-08-28T11:00:00.000	32.0	33.25
CTD	CYBO14J2	2002-08-29T12:45:00.000	32.0	33.5
CTD	CYBO14J1	2002-08-29T03:45:00.000	31.5	33.5
CTD	CYBO14J0	2002-08-29T06:35:00.000	31.0	33.5
CTD	CYBO14I0	2002-08-29T01:00:00.000	30.5	34.0
CTD	CYBO14I1	2002-08-29T06:10:00.000	31.0	34.0
CTD	CYBO14F0	2002-08-29T09:20:00.000	31.0	34.5
CTD	CYBO14F01	2002-08-30T12:00:00.000	30.5	34.5
CTD	CYBO14A02	2002-08-30T03:20:00.000	30.5	35.0
CTD	CYBO14A01	2002-08-30T05:55:00.000	31.0	35.0
CTD	CYBO14A0	2002-08-30T08:30:00.000	31.5	35.0
CTD	CYBO14C1	2002-08-30T10:20:00.000	31.5	34.75
CTD	CYBO14F1	2002-08-30T12:15:00.000	31.5	34.5
CTD	CYBO14H1	2002-08-30T02:05:00.000	31.5	34.25
CTD	CYBO14I2	2002-08-30T04:00:00.000	31.5	34.0
CTD	CYBO14MAI2	2002-08-30T06:30:00.000	31.93	34.133
CTD	CYBO14H2	2002-08-30T08:15:00.000	32.0	34.25
CTD	CYBO14F2	2002-08-30T10:00:00.000	32.0	34.5
CTD	CYBO14D1	2002-08-30T11:25:00.000	32.0	34.667
CTD	CYBO14B1	2002-08-31T12:55:00.000	32.0	34.833
CTD	CYBO14A2	2002-08-31T02:20:00.000	32.0	35.0
CTD	CYBO14A1	2002-08-31T03:50:00.000	32.0	35.167
CTD	CYBO14A4	2002-08-31T05:15:00.000	32.1667	35.083
CTD	CYBO14A3	2002-08-31T06:40:00.000	32.1667	34.917
CTD	CYBO14B3	2002-08-31T07:50:00.000	32.25	34.833
CTD	CYBO14C2	2002-08-31T09:00:00.000	32.1667	34.75
CTD	CYBO14C3	2002-08-31T10:10:00.000	32.3333	34.75
CTD	CYBO14D3	2002-08-31T11:00:00.000	32.3333	34.667
CTD	CYBO14E1	2002-08-31T11:55:00.000	32.4167	34.583
CTD	CYBO14F3	2002-08-31T01:50:00.000	32.3333	34.5
CTD	CYBO14F4	2002-08-31T03:05:00.000	32.5	34.5
CTD	CYBO14E2	2002-08-31T04:05:00.000	32.5833	34.583
CTD	CYBO14F5	2002-08-31T05:00:00.000	32.6667	34.5
CTD	CYBO14E4	2002-08-31T06:25:00.000	32.8333	34.583
CTD	CYBO14F6	2002-08-31T07:00:00.000	32.8333	34.5
CTD	CYBO14G3A	2002-08-31T08:00:00.000	32.75	34.417
CTD	CYBO14G4a	2002-08-31T09:35:00.000	33.0	34.417
CTD	CYBO14F7	2002-08-31T10:30:00.000	33.0	34.5
CTD	CYBO15D16	2003-05-17T05:25:00.000	33.0833	34.625
CTD	CYBO15e5A	2003-05-17T06:00:00.000	33.0833	34.583
CTD	CYBO15d17	2003-05-17T06:50:00.000	33.1667	34.625
CTD	CYBO15E6	2003-05-17T07:25:00.000	33.1667	34.583
CTD	CYBO15F9	2003-05-17T08:25:00.000	33.1667	34.5
CTD	CYBO15E7	2003-05-17T09:40:00.000	33.25	34.583
CTD	CYBO15F10	2003-05-17T11:10:00.000	33.3333	34.5
CTD	CYBO15E8	2003-05-18T12:10:00.000	33.3333	34.583
CTD	CYBO15D8a	2003-05-18T01:45:00.000	33.4167	34.692
CTD	CYBO15D10	2003-05-18T02:30:00.000	33.5	34.667
CTD	CYBO15E9	2003-05-18T03:25:00.000	33.5	34.583
CTD	CYBO15F12	2003-05-18T04:45:00.000	33.6667	34.5
CTD	CYBO15D11	2003-05-18T06:00:00.000	33.6667	34.667
CTD	CYBO15C6	2003-05-18T07:20:00.000	33.75	34.75
CTD	CYBO15B4	2003-05-18T08:40:00.000	33.6667	34.833
CTD	CYBO15A6a	2003-05-18T09:25:00.000	33.7567	34.892
CTD	CYBO15B6	2003-05-18T10:34:00.000	33.8333	34.833
CTD	CYBO15D12	2003-05-18T12:26:00.000	33.8333	34.667
CTD	CYBO15D13	2003-05-18T02:00:00.000	34.0	34.667
CTD	CYBO15A9	2003-05-18T06:45:00.000	34.1667	34.917
CTD	CYBO15B8	2003-05-18T07:50:00.000	34.1667	34.833
CTD	CYBO15D14	2003-05-18T09:31:00.000	34.1667	34.667
CTD	CYBO15C10	2003-05-18T11:20:00.000	34.3333	34.75
CTD	CYBO15B9	2003-05-19T12:50:00.000	34.3333	34.833
CTD	CYBO15A12	2003-05-19T03:47:00.000	34.5	34.917
CTD	CYBO15C11	2003-05-19T05:30:00.000	34.6667	34.75
CTD	CYBO15F17	2003-05-19T07:35:00.000	34.6667	34.5
CTD	CYBO15F16	2003-05-19T09:48:00.000	34.3333	34.5
CTD	CYBO15H6	2003-05-19T03:14:00.000	34.0	34.25
CTD	CYBO15F14	2003-05-19T05:10:00.000	34.0	34.5
CTD	CYBO15G7a	2003-05-19T07:45:00.000	33.8333	34.417
CTD	CYBO15H5	2003-05-19T09:05:00.000	33.5	34.25
CTD	CYBO15H4	2003-05-20T12:00:00.000	33.0	34.25
CTD	CYBO15H3	2003-05-20T02:45:00.000	32.5	34.25
CTD	CYBO15I4	2003-05-20T04:50:00.000	32.5	34.0
CTD	CYBO15ESMa	2003-05-20T07:25:00.000	32.75	33.75
CTD	CYBO15I5	2003-05-20T09:55:00.000	33.0	34.0
CTD	CYBO15I6	2003-05-20T01:05:00.000	33.5	34.0
CTD	CYBO15I7	2003-05-20T03:35:00.000	34.0	34.0
CTD	CYBO15I8	2003-05-20T06:25:00.000	34.5	34.0
CTD	CYBO15H7	2003-05-20T08:40:00.000	34.5	34.25
CTD	CYBO15I8J7	2003-05-21T12:00:00.000	34.5	33.75
CTD	CYBO15J7	2003-05-21T02:08:00.000	34.5	33.5
CTD	CYBO15J6	2003-05-21T05:25:00.000	34.0	33.5
CTD	CYBO15J5	2003-05-21T08:40:00.000	33.5	33.5
CTD	CYBO15K4e	2003-05-21T11:05:00.000	33.25	33.375
CTD	CYBO15K4a	2003-05-21T01:30:00.000	33.0	33.25
CTD	CYBO15J4	2003-05-21T03:55:00.000	33.0	33.5
CTD	CYBO15J3	2003-05-21T07:20:00.000	32.5	33.5
CTD	CYBO15K2e	2003-05-21T09:33:00.000	32.25	33.375
CTD	CYBO15K2a	2003-05-22T12:00:00.000	32.0	33.25
CTD	CYBO15J2	2003-05-22T02:40:00.000	32.0	33.5
CTD	CYBO15K2f	2003-05-22T04:50:00.000	31.75	33.375
CTD	CYBO15J1	2003-05-22T06:55:00.000	31.5	33.5
CTD	CYBO15I1	2003-05-22T06:40:00.000	31.0	34.0
CTD	CYBO15F1	2003-05-23T12:50:00.000	30.5	34.5
CTD	CYBO15C1	2003-05-23T11:25:00.000	31.5	34.75
CTD	CYBO15F1	2003-05-23T01:37:00.000	31.5	34.5
CTD	CYBO15H1	2003-05-23T03:35:00.000	31.5	34.25
CTD	CYBO15I2	2003-05-23T05:35:00.000	31.5	34.0
CTD	CYBO15I3	2003-05-23T08:45:00.000	32.0	34.0
CTD	CYBO15H2	2003-05-23T10:53:00.000	32.0	34.25
CTD	CYBO15F2	2003-05-24T12:53:00.000	32.0	34.5
CTD	CYBO15D1	2003-05-24T03:05:00.000	32.0	34.667
CTD	CYBO15B1	2003-05-24T04:40:00.000	32.0	34.833
CTD	CYBO15A2	2003-05-24T06:10:00.000	32.0	35.0
CTD	CYBO15A4	2003-05-24T07:35:00.000	32.1667	35.083
CTD	CYBO15A3	2003-05-24T09:15:00.000	32.1667	34.917
CTD	CYBO15B3	2003-05-24T10:30:00.000	32.25	34.833
CTD	CYBO15C2	2003-05-24T11:56:00.000	32.1667	34.75
CTD	CYBO15C3	2003-05-24T01:17:00.000	32.3333	34.75
CTD	CYBO15D3	2003-05-24T02:10:00.000	32.3333	34.667
CTD	CYBO15E1	2003-05-24T03:05:00.000	32.4167	34.583
CTD	CYBO15F3	2003-05-24T04:25:00.000	32.3333	34.5
CTD	CYBO15F4	2003-05-24T06:00:00.000	32.5	34.5
CTD	CYBO15E2	2003-05-24T07:25:00.000	32.5833	34.583
CTD	CYBO15F5	2003-05-24T08:40:00.000	32.6667	34.5
CTD	CYBO15E4	2003-05-24T10:17:00.000	32.8333	34.583
CTD	CYBO15F6	2003-05-24T10:55:00.000	32.8333	34.5
CTD	CYBO15G3a	2003-05-25T12:00:00.000	32.75	34.417
CTD	CYBO15G4a	2003-05-25T01:55:00.000	33.0	34.417
CTD	CYBO15F7	2003-05-25T03:10:00.000	33.0	34.5
CTD	CYBO16D16	2003-08-23T02:55:00.000	33.0833	34.625
CTD	CYBO16E5a	2003-08-23T05:30:00.000	33.0833	34.583
CTD	CYBO16D17	2003-08-23T06:25:00.000	33.1667	34.625
CTD	CYBO16E6	2003-08-23T07:10:00.000	33.1667	34.583
CTD	CYBO16F9	2003-08-23T08:20:00.000	33.1667	34.5
CTD	CYBO16E7	2003-08-23T09:55:00.000	33.25	34.417
CTD	CYBO16F10	2003-08-23T11:35:00.000	33.3333	34.5
CTD	CYBO16E8	2003-08-25T12:40:00.000	33.3333	34.583
CTD	CYBO16D8a	2003-08-24T02:00:00.000	33.4167	34.692
CTD	CYBO16D10	2003-08-24T02:35:00.000	33.5	34.667
CTD	CYBO16E9	2003-08-24T03:45:00.000	33.5	34.583
CTD	CYBO16F12	2003-08-24T05:15:00.000	33.6667	34.5
CTD	CYBO16D11	2003-08-24T06:42:00.000	33.6667	34.667
CTD	CYBO16C6	2003-08-24T08:00:00.000	33.75	34.75
CTD	CYBO16B4	2003-08-24T09:35:00.000	33.6667	34.833
CTD	CYBO16B4a	2003-08-24T10:00:00.000	33.6472	34.858
CTD	CYBO16A6a	2003-08-24T10:41:00.000	33.7567	34.892
CTD	CYBO16B6	2003-08-24T11:50:00.000	33.8333	34.833
CTD	CYBO16D12	2003-08-24T02:10:00.000	33.8333	34.667
CTD	CYBO16F7	2003-08-25T10:10:00.000	33.0	34.5
CTD	CYBO16G4a	2003-08-25T11:20:00.000	33.0	34.417
CTD	CYBO16G3a	2003-08-25T01:35:00.000	32.75	34.417
CTD	CYBO16F6	2003-08-25T03:00:00.000	32.8333	34.5
CTD	CYBO16E4	2003-08-25T04:05:00.000	32.8333	34.583
CTD	CYBO16F5	2003-08-25T05:15:00.000	32.6667	34.5
CTD	CYBO16E2	2003-08-25T06:40:00.000	32.5833	34.583
CTD	CYBO16F4	2003-08-25T07:50:00.000	32.5	34.5
CTD	CYBO16G2a	2003-08-25T09:10:00.000	32.5	34.417
CTD	CYBO16F3	2003-08-25T10:50:00.000	32.3333	34.5
CTD	CYBO16E1	2003-08-26T12:16:00.000	32.4167	34.583
CTD	CYBO16D3	2003-08-26T01:36:00.000	32.3333	34.667
CTD	CYBO16C3	2003-08-26T02:33:00.000	32.3333	34.75
CTD	CYBO16C2	2003-08-26T03:48:00.000	32.1875	34.758
CTD	CYBO16A3	2003-08-26T05:35:00.000	32.1667	34.917
CTD	CYBO16A4	2003-08-26T07:15:00.000	32.1667	35.083
CTD	CYBO16A2	2003-08-26T08:48:00.000	32.0	35.0
CTD	CYBO16B1	2003-08-26T10:30:00.000	32.0	34.833
CTD	CYBO16D1	2003-08-26T12:24:00.000	32.0	34.667
CTD	CYBO16F2	2003-08-26T02:17:00.000	32.0	34.5
CTD	CYBO16H2	2003-08-26T04:27:00.000	32.0	34.25
CTD	CYBO16I3	2003-08-26T06:35:00.000	32.0	34.0
CTD	CYBO16I2	2003-08-26T10:00:00.000	31.5	34.0
CTD	CYBO16H1	2003-08-27T12:24:00.000	31.5	34.25
CTD	CYBO16F1	2003-08-27T02:49:00.000	31.5	34.5
CTD	CYBO16C1	2003-08-27T05:05:00.000	31.5	34.75
CTD	CYBO16A0	2003-08-27T07:15:00.000	31.5	35.0
CTD	CYBO16A01	2003-08-27T10:23:00.000	31.0	35.0
CTD	CYBO16F0	2003-08-27T02:10:00.000	31.0	34.5
CTD	CYBO16I1	2003-08-27T05:43:00.000	31.0	34.0
CTD	CYBO16J0	2003-08-27T09:15:00.000	31.0	33.167
CTD	CYBO16J1	2003-08-28T12:16:00.000	31.5	33.5
CTD	CYBO16J2	2003-08-28T03:17:00.000	32.0	33.5
CTD	CYBO16K2a	2003-08-28T05:35:00.000	32.0	33.25
CTD	CYBO16K3a	2003-08-28T08:35:00.000	32.5	33.25
CTD	CYBO16J3	2003-08-28T10:44:00.000	32.5	33.5
CTD	CYBO16J4	2003-08-28T01:40:00.000	33.0	33.5
CTD	CYBO16K4a	2003-08-28T03:42:00.000	33.0	33.25
CTD	CYBO16J5	2003-08-28T07:14:00.000	33.5	33.5
CTD	CYBO16J6	2003-08-28T10:14:00.000	34.0	33.5
CTD	CYBO16J7	2003-08-29T01:09:00.000	34.5	33.5
CTD	CYBO16I8	2003-08-29T04:40:00.000	34.5	34.0
CTD	CYBO16H7	2003-08-29T06:47:00.000	34.5	34.25
CTD	CYBO16F16	2003-08-29T09:08:00.000	34.3333	34.5
CTD	CYBO16F17	2003-08-29T11:23:00.000	34.6667	34.5
CTD	CYBO16C11	2003-08-29T01:27:00.000	34.6667	34.75
CTD	CYBO16A12	2003-08-29T03:25:00.000	34.5	34.917
CTD	CYBO16B9	2003-08-29T05:07:00.000	34.3333	34.833
CTD	CYBO16C10	2003-08-29T06:17:00.000	34.3333	34.75
CTD	CYBO16D14	2003-08-29T07:55:00.000	34.1667	34.667
CTD	CYBO16B8	2003-08-29T09:30:00.000	34.1667	34.833
CTD	CYBO16A9	2003-08-29T10:47:00.000	34.1667	34.917
CTD	CYBO16A8	2003-08-30T12:07:00.000	34.0	34.917
CTD	CYBO16B7	2003-08-30T01:00:00.000	34.0	34.833
CTD	CYBO16C8	2003-08-30T02:09:00.000	34.0	34.75
CTD	CYBO16D13	2003-08-30T03:18:00.000	34.0	34.667
CTD	CYBO16F14	2003-08-30T04:55:00.000	34.0	34.5
CTD	CYBO16G7a	2003-08-30T06:37:00.000	33.8333	34.417
CTD	CYBO16H6	2003-08-30T08:25:00.000	34.0	34.25
CTD	CYBO16I7	2003-08-30T10:31:00.000	34.0	34.0
CTD	CYBO16I6	2003-08-30T01:50:00.000	33.5	34.0
CTD	CYBO16H5	2003-08-30T04:30:00.000	33.5	34.25
CTD	CYBO16I5	2003-08-30T08:10:00.000	33.0	34.0
CTD	CYBO16I4J3	2003-08-30T11:51:00.000	32.5	33.75
CTD	CYBO16I4	2003-08-31T01:51:00.000	32.5	34.0
CTD	CYBO16H3	2003-08-31T04:00:00.000	32.5	34.25
CTD	CYBO16H4	2003-08-31T06:55:00.000	33.0	34.25
CTD	CYBO17D16	2004-04-24T04:40:00.000	33.0833	34.617
CTD	CYBO17D17	2004-04-25T07:22:00.000	33.1667	34.625
CTD	CYBO17E6	2004-04-25T08:00:00.000	33.1667	34.583
CTD	CYBO17F9	2004-04-25T08:56:00.000	33.1667	34.5
CTD	CYBO17E7	2004-04-25T10:12:00.000	33.25	34.417
CTD	CYBO17F10	2004-04-26T12:44:00.000	33.3333	34.5
CTD	CYBO17E8	2004-04-26T01:38:00.000	33.3333	34.583
CTD	CYBO17D8a	2004-04-26T02:58:00.000	33.4167	34.692
CTD	CYBO17D10	2004-04-26T03:40:00.000	33.5	34.667
CTD	CYBO17E9	2004-04-26T04:35:00.000	33.5	34.583
CTD	CYBO17F12	2004-04-26T06:11:00.000	33.6667	34.5
CTD	CYBO17D11	2004-04-26T07:35:00.000	33.6667	34.667
CTD	CYBO17C6	2004-04-26T08:55:00.000	33.75	34.75
CTD	CYBO17B4	2004-04-26T10:15:00.000	33.6667	34.833
CTD	CYBO17A6a	2004-04-26T10:58:00.000	33.7567	34.892
CTD	CYBO17B6	2004-04-26T12:00:00.000	33.8333	34.833
CTD	CYBO17D12	2004-04-26T01:48:00.000	33.8333	34.667
CTD	CYBO17D13	2004-04-26T03:33:00.000	34.0	34.667
CTD	CYBO17C8	2004-04-26T05:12:00.000	34.0	34.75
CTD	CYBO17B7	2004-04-26T06:26:00.000	34.0	34.833
CTD	CYBO17A8	2004-04-26T07:40:00.000	34.0	34.917
CTD	CYBO17A9	2004-04-26T08:52:00.000	34.1667	34.917
CTD	CYBO17B8	2004-04-26T09:55:00.000	34.1667	34.833
CTD	CYBO17D14	2004-04-26T11:32:00.000	34.1667	34.667
CTD	CYBO17C10	2004-04-27T01:12:00.000	34.3333	34.75
CTD	CYBO17B9	2004-04-27T02:17:00.000	34.3333	34.833
CTD	CYBO17A12	2004-04-27T03:49:00.000	34.5	34.917
CTD	CYBO17C11	2004-04-27T05:43:00.000	34.6667	34.75
CTD	CYBO17F17	2004-04-27T08:03:00.000	34.6667	34.5
CTD	CYBO17F16	2004-04-27T10:24:00.000	34.3333	34.5
CTD	CYBO17H7	2004-04-27T12:53:00.000	34.5	34.25
CTD	CYBO17H6	2004-04-27T04:06:00.000	34.0	34.25
CTD	CYBO17F14	2004-04-27T06:22:00.000	34.0	34.5
CTD	CYBO17G7a	2004-04-27T07:21:00.000	33.8333	34.417
CTD	CYBO17H5	2004-04-27T10:19:00.000	33.5	34.25
CTD	CYBO17H4	2004-04-28T01:37:00.000	33.0	34.25
CTD	CYBO17H3	2004-04-28T04:45:00.000	32.5	34.25
CTD	CYBO17I4	2004-04-28T06:58:00.000	32.5	34.0
CTD	CYBO17I5J4	2004-04-28T10:25:00.000	33.0	33.75
CTD	CYBO17I5	2004-04-28T12:28:00.000	33.0	34.0
CTD	CYBO17I6	2004-04-28T03:31:00.000	33.5	34.0
CTD	CYBO17I7	2004-04-28T06:45:00.000	34.0	34.0
CTD	CYBO17I8	2004-04-28T10:01:00.000	34.5	34.0
CTD	CYBO17J7	2004-04-29T01:34:00.000	34.5	33.5
CTD	CYBO17J6	2004-04-29T04:54:00.000	34.0	33.5
CTD	CYBO17J5	2004-04-29T08:15:00.000	33.5	33.5
CTD	CYBO17K4a	2004-04-29T12:00:00.000	33.0	33.25
CTD	CYBO17J4	2004-04-29T03:45:00.000	33.0	33.5
CTD	CYBO17J3	2004-04-29T07:55:00.000	32.5	33.5
CTD	CYBO17K2a	2004-04-29T11:56:00.000	32.0	33.25
CTD	CYBO17J2	2004-04-30T02:25:00.000	32.0	33.5
CTD	CYBO17J1	2004-04-30T05:55:00.000	31.5	33.5
CTD	CYBO17J0	2004-04-30T03:00:00.000	31.0	33.5
CTD	CYBO17I0	2004-04-30T07:40:00.000	30.5	34.0
CTD	CYBO17I1	2004-04-30T10:52:00.000	31.0	34.0
CTD	CYBO17F0	2004-05-01T02:35:00.000	31.0	34.5
CTD	CYBO17F01	2004-05-01T05:45:00.000	30.5	34.5
CTD	CYBO17A02	2004-05-01T09:13:00.000	30.5	35.0
CTD	CYBO17A01	2004-05-01T12:44:00.000	31.0	35.0
CTD	CYBO17A0	2004-05-01T03:45:00.000	31.5	35.0
CTD	CYBO17C1	2004-05-01T05:55:00.000	31.5	34.75
CTD	CYBO17F1	2004-05-01T08:05:00.000	31.5	34.5
CTD	CYBO17H1	2004-05-01T10:28:00.000	31.5	34.25
CTD	CYBO17I2	2004-05-02T12:59:00.000	31.5	34.0
CTD	CYBO17I3J2	2004-05-02T04:35:00.000	32.0	33.75
CTD	CYBO17I3	2004-05-02T06:40:00.000	32.0	34.0
CTD	CYBO17H2	2004-05-02T09:08:00.000	32.0	34.25
CTD	CYBO17F2	2004-05-02T11:41:00.000	32.0	34.5
CTD	CYBO17D1	2004-05-02T12:29:00.000	32.0	34.667
CTD	CYBO17B1	2004-05-02T03:12:00.000	32.0	34.833
CTD	CYBO17A2	2004-05-02T04:51:00.000	32.0	35.0
CTD	CYBO17A4	2004-05-02T06:25:00.000	32.1667	35.083
CTD	CYBO17A3	2004-05-02T08:19:00.000	32.1667	34.917
CTD	CYBO17B3	2004-05-02T09:43:00.000	32.25	34.833
CTD	CYBO17C2	2004-05-02T10:57:00.000	32.1667	34.75
CTD	CYBO17C3	2004-05-03T12:27:00.000	32.3333	34.75
CTD	CYBO17D3	2004-05-03T01:22:00.000	32.3333	34.667
CTD	CYBO17E1	2004-05-03T02:20:00.000	32.4167	34.583
CTD	CYBO17F3	2004-05-03T03:34:00.000	32.3333	34.5
CTD	CYBO17F4	2004-05-03T05:05:00.000	32.5	34.5
CTD	CYBO17E2	2004-05-03T06:25:00.000	32.5833	34.583
CTD	CYBO17F5	2004-05-03T08:12:00.000	32.6667	34.5
CTD	CYBO17E4	2004-05-03T09:10:00.000	32.8333	34.583
CTD	CYBO17F6	2004-05-03T09:52:00.000	32.8333	34.5
CTD	CYBO17G3b	2004-05-03T10:50:00.000	32.8333	34.417
CTD	CYBO17G4a	2004-05-03T12:14:00.000	33.0	34.417
CTD	CYBO17F7	2004-05-03T01:22:00.000	33.0	34.5
CTD	CYBO18D16	2004-08-16T06:50:00.000	33.0833	34.625
CTD	CYBO18E5a	2004-08-16T07:20:00.000	33.0833	34.583
CTD	CYBO18D17	2004-08-16T08:15:00.000	33.1667	34.617
CTD	CYBO18E6	2004-08-16T08:49:00.000	33.1667	34.583
CTD	CYBO18F9	2004-08-16T09:50:00.000	33.1667	34.5
CTD	CYBO18E7	2004-08-16T11:10:00.000	33.25	34.417
CTD	CYBO18F10	2004-08-17T12:49:00.000	33.3333	34.5
CTD	CYBO18E8	2004-08-17T01:50:00.000	33.3333	34.583
CTD	CYBO18D8a	2004-08-17T03:16:00.000	33.4167	34.692
CTD	CYBO18D10	2004-08-17T04:00:00.000	33.5	34.667
CTD	CYBO18E9	2004-08-17T05:02:00.000	33.5	34.583
CTD	CYBO18F12	2004-08-17T06:40:00.000	33.6667	34.5
CTD	CYBO18C6	2004-08-17T09:25:00.000	33.75	34.75
CTD	CYBO18B4	2004-08-17T10:56:00.000	33.6667	34.833
CTD	CYBO18A6a	2004-08-17T11:43:00.000	33.7567	34.892
CTD	CYBO18B6	2004-08-17T02:14:00.000	33.8333	34.833
CTD	CYBO18D12	2004-08-18T11:30:00.000	33.8333	34.667
CTD	CYBO18D13	2004-08-18T01:10:00.000	34.0	34.667
CTD	CYBO18C8	2004-08-18T02:40:00.000	34.0	34.75
CTD	CYBO18B7	2004-08-18T04:23:00.000	34.0	34.833
CTD	CYBO18A8	2004-08-18T05:45:00.000	34.0	34.917
CTD	CYBO18A9	2004-08-18T07:14:00.000	34.1667	34.917
CTD	CYBO18B8	2004-08-18T08:28:00.000	34.1667	34.833
CTD	CYBO18D14	2004-08-18T10:27:00.000	34.1667	34.667
CTD	CYBO18C10	2004-08-19T12:00:00.000	34.3333	34.75
CTD	CYBO18B9	2004-08-19T01:14:00.000	34.3333	34.833
CTD	CYBO18A12	2004-08-19T02:47:00.000	34.5	34.917
CTD	CYBO18C11	2004-08-19T04:50:00.000	34.6667	34.75
CTD	CYBO18F17	2004-08-19T07:10:00.000	34.6667	34.5
CTD	CYBO18F16	2004-08-19T09:28:00.000	34.3333	34.5
CTD	CYBO18H7	2004-08-19T11:51:00.000	34.5	34.25
CTD	CYBO18H6	2004-08-19T03:15:00.000	34.0	34.25
CTD	CYBO18F14	2004-08-19T05:26:00.000	34.0	34.5
CTD	CYBO18G7a	2004-08-19T07:05:00.000	33.8333	34.417
CTD	CYBO18H5	2004-08-19T09:39:00.000	33.5	34.25
CTD	CYBO18H4	2004-08-20T01:00:00.000	33.0	34.25
CTD	CYBO18H3	2004-08-20T04:31:00.000	32.5	34.25
CTD	CYBO18I4	2004-08-20T06:38:00.000	32.5	34.0
CTD	CYBO18I5	2004-08-20T09:44:00.000	33.0	34.0
CTD	CYBO18I6	2004-08-20T12:40:00.000	33.5	34.0
CTD	CYBO18I7	2004-08-20T03:40:00.000	34.0	34.0
CTD	CYBO18I8	2004-08-20T06:44:00.000	34.5	34.0
CTD	CYBO18J7	2004-08-20T10:34:00.000	34.5	33.5
CTD	CYBO18J6	2004-08-21T01:48:00.000	34.0	33.5
CTD	CYBO18J5	2004-08-21T05:15:00.000	33.5	33.5
CTD	CYBO18J4	2004-08-21T11:05:00.000	33.0	33.5
CTD	CYBO18K4a	2004-08-21T01:08:00.000	33.0	33.25
CTD	CYBO18K4	2004-08-21T03:21:00.000	33.0	33.0
CTD	CYBO18L4	2004-08-21T05:28:00.000	33.0	32.75
CTD	CYBO18M4	2004-08-21T07:31:00.000	33.0	32.5
CTD	CYBO18N4	2004-08-21T09:35:00.000	33.0	32.25
CTD	CYBO18K3a	2004-08-22T04:30:00.000	32.6333	33.25
CTD	CYBO18J3	2004-08-22T06:45:00.000	32.5	33.5
CTD	CYBO18MCS	2004-08-22T09:36:00.000	32.143	33.693
CTD	CYBO18J2	2004-08-22T12:14:00.000	32.0	33.5
CTD	CYBO18K2a	2004-08-22T02:34:00.000	32.0	33.25
CTD	CYBO18J1	2004-08-23T01:27:00.000	31.5	33.5
CTD	CYBO18J0	2004-08-23T04:33:00.000	31.0	33.5
CTD	CYBO18I1	2004-08-23T08:04:00.000	31.0	34.0
CTD	CYBO18F0	2004-08-23T11:33:00.000	31.0	34.5
CTD	CYBO18A01	2004-08-23T03:17:00.000	31.0	35.0
CTD	CYBO18A0	2004-08-23T06:18:00.000	31.5	35.0
CTD	CYBO18C1	2004-08-23T08:22:00.000	31.5	34.75
CTD	CYBO18F1	2004-08-23T10:28:00.000	31.5	34.5
CTD	CYBO18H1	2004-08-24T12:33:00.000	31.5	34.25
CTD	CYBO18I2	2004-08-24T02:44:00.000	31.5	34.0
CTD	CYBO18I3	2004-08-24T05:58:00.000	32.0	34.0
CTD	CYBO18H2	2004-08-24T08:19:00.000	32.0	34.25
CTD	CYBO18F2	2004-08-24T10:36:00.000	32.0	34.5
CTD	CYBO18D1	2004-08-24T12:25:00.000	32.0	34.667
CTD	CYBO18B1	2004-08-24T02:16:00.000	32.0	34.833
CTD	CYBO18A2	2004-08-24T04:03:00.000	32.0	35.0
CTD	CYBO18A4	2004-08-24T05:45:00.000	32.1667	35.083
CTD	CYBO18A3	2004-08-24T07:25:00.000	32.1667	34.917
CTD	CYBO18B3	2004-08-24T08:40:00.000	32.25	34.833
CTD	CYBO18C2	2004-08-24T09:56:00.000	32.1667	34.75
CTD	CYBO18C3	2004-08-24T11:21:00.000	32.3333	34.75
CTD	CYBO18D3	2004-08-25T12:17:00.000	32.5	34.667
CTD	CYBO18E1	2004-08-25T01:13:00.000	32.4167	34.583
CTD	CYBO18F3	2004-08-25T02:30:00.000	32.3333	34.5
CTD	CYBO18F4	2004-08-25T03:53:00.000	32.5	34.5
CTD	CYBO18E2	2004-08-25T05:10:00.000	32.5833	34.583
CTD	CYBO18F5	2004-08-25T06:19:00.000	32.6667	34.5
CTD	CYBO18E4	2004-08-25T07:49:00.000	32.8333	34.583
CTD	CYBO18F6	2004-08-25T08:29:00.000	32.8333	34.5
CTD	CYBO18G3b	2004-08-25T09:30:00.000	32.8333	34.417
CTD	CYBO18G4a	2004-08-25T10:52:00.000	33.0	34.417
CTD	CYBO18F7	2004-08-25T12:05:00.000	33.0	34.5
CTD	CYBO19D16	2005-09-05T08:15:00.000	33.08333	34.625
CTD	CYBO19E5a	2005-09-05T08:46:00.000	33.08333	34.583
CTD	CYBO19D17	2005-09-05T09:40:00.000	33.16667	34.617
CTD	CYBO19E6	2005-09-05T10:14:00.000	33.16667	34.583
CTD	CYBO19F9	2005-09-05T11:10:00.000	33.16667	34.5
CTD	CYBO19E7	2005-09-05T12:24:00.000	33.25	34.417
CTD	CYBO19F10	2005-09-05T01:55:00.000	33.33333	34.5
CTD	CYBO19E8	2005-09-05T02:50:00.000	33.33333	34.583
CTD	CYBO19D8	2005-09-05T04:05:00.000	33.41667	34.75
CTD	CYBO19D10	2005-09-05T04:45:00.000	33.5	34.667
CTD	CYBO19E9	2005-09-05T05:37:00.000	33.5	34.583
CTD	CYBO19F12	2005-09-05T07:07:00.000	33.66667	34.5
CTD	CYBO19D11	2005-09-05T09:30:00.000	33.66667	34.667
CTD	CYBO19C6	2005-09-05T10:57:00.000	33.75	34.75
CTD	CYBO19B4	2005-09-06T12:25:00.000	33.66667	34.833
CTD	CYBO19A6a	2005-09-06T01:15:00.000	33.75	34.883
CTD	CYBO19B6	2005-09-06T02:12:00.000	33.83333	34.833
CTD	CYBO19D12	2005-09-06T03:47:00.000	33.83333	34.667
CTD	CYBO19D13	2005-09-06T05:20:00.000	34.0	34.667
CTD	CYBO19C8	2005-09-06T06:39:00.000	34.0	34.75
CTD	CYBO19B7	2005-09-06T07:48:00.000	34.0	34.833
CTD	CYBO19A8	2005-09-06T09:01:00.000	34.0	34.917
CTD	CYBO19A9	2005-09-06T10:42:00.000	34.16667	34.917
CTD	CYBO19B8	2005-09-06T11:47:00.000	34.16667	34.833
CTD	CYBO19D14	2005-09-06T01:30:00.000	34.16667	34.667
CTD	CYBO19C10	2005-09-06T03:01:00.000	34.33333	34.75
CTD	CYBO19B9	2005-09-06T04:09:00.000	34.33333	34.833
CTD	CYBO19A12	2005-09-06T05:44:00.000	34.5	34.917
CTD	CYBO19C11	2005-09-06T07:42:00.000	34.66667	34.75
CTD	CYBO19F16	2005-09-07T12:35:00.000	34.33333	34.5
CTD	CYBO19H7	2005-09-07T02:45:00.000	34.5	34.25
CTD	CYBO19H6	2005-09-07T06:00:00.000	34.0	34.25
CTD	CYBO19F14	2005-09-07T08:15:00.000	34.0	34.5
CTD	CYBO19G7a	2005-09-07T09:55:00.000	33.83333	34.417
CTD	CYBO19H5	2005-09-07T12:30:00.000	33.5	34.25
CTD	CYBO19I6	2005-09-07T02:45:00.000	33.5	34.0
CTD	CYBO19I7	2005-09-07T05:45:00.000	34.0	34.0
CTD	CYBO19I8	2005-09-07T09:01:00.000	34.5	34.0
CTD	CYBO19J7	2005-09-08T04:00:00.000	34.5	33.5
CTD	CYBO19J6	2005-09-08T03:55:00.000	34.0	33.5
CTD	CYBO19J5	2005-09-08T07:24:00.000	33.5	33.5
CTD	CYBO19K5a	2005-09-08T10:05:00.000	33.25	33.25
CTD	CYBO19K4	2005-09-08T12:41:00.000	33.0	33.0
CTD	CYBO19L4	2005-09-08T02:48:00.000	33.0	32.75
CTD	CYBO19M4	2005-09-08T05:00:00.000	33.0	32.5
CTD	CYBO19N4	2005-09-08T07:12:00.000	33.0	32.25
CTD	CYBO19O4	2005-09-08T09:30:00.000	33.0	32.0
CTD	CYBO19P4	2005-09-08T02:32:00.000	33.0	31.75
CTD	CYBO19K4a	2005-09-09T08:38:00.000	33.0	33.25
CTD	CYBO19J4	2005-09-09T10:55:00.000	33.0	33.5
CTD	CYBO19I5J4	2005-09-09T01:22:00.000	33.0	33.75
CTD	CYBO19I5	2005-09-09T03:44:00.000	33.0	34.0
CTD	CYBO19H4	2005-09-09T06:12:00.000	33.0	34.25
CTD	CYBO19G4a	2005-09-09T08:15:00.000	33.0	34.417
CTD	CYBO19F7	2005-09-10T02:13:00.000	33.0	34.5
CTD	CYBO19G3b	2005-09-10T01:56:00.000	32.83333	34.417
CTD	CYBO19H3	2005-09-10T04:45:00.000	32.5	34.25
CTD	CYBO19I4	2005-09-10T06:58:00.000	32.5	34.0
CTD	CYBO19J3	2005-09-10T10:44:00.000	32.5	33.5
CTD	CYBO19K3b	2005-09-10T12:58:00.000	32.5	33.25
CTD	CYBO19K2a	2005-09-10T04:24:00.000	32.0	33.25
CTD	CYBO19J2	2005-09-10T06:50:00.000	32.0	33.5
CTD	CYBO19J1	2005-09-10T02:22:00.000	31.5	33.5
CTD	CYBO19J0	2005-09-11T01:55:00.000	31.0	33.5
CTD	CYBO19I1	2005-09-11T05:48:00.000	31.0	34.0
CTD	CYBO19F0	2005-09-11T09:36:00.000	31.0	34.5
CTD	CYBO19A01	2005-09-11T01:13:00.000	31.0	35.0
CTD	CYBO19A0	2005-09-11T04:10:00.000	31.5	35.0
CTD	CYBO19C1	2005-09-11T06:30:00.000	31.5	34.75
CTD	CYBO19F1	2005-09-11T08:42:00.000	31.5	34.5
CTD	CYBO19H1	2005-09-11T10:53:00.000	31.5	34.25
CTD	CYBO19I2	2005-09-12T01:10:00.000	31.5	34.0
CTD	CYBO19I3	2005-09-12T04:15:00.000	32.0	34.0
CTD	CYBO19H2	2005-09-12T06:28:00.000	32.0	34.25
CTD	CYBO19F2	2005-09-12T08:41:00.000	32.0	34.5
CTD	CYBO19D1	2005-09-12T10:25:00.000	32.0	34.667
CTD	CYBO19B1	2005-09-12T12:09:00.000	32.0	34.833
CTD	CYBO19A2	2005-09-12T01:56:00.000	32.0	35.0
CTD	CYBO19A3	2005-09-12T03:37:00.000	32.16667	34.917
CTD	CYBO19B3	2005-09-12T04:57:00.000	32.25	34.833
CTD	CYBO19C2C3	2005-09-12T06:03:00.000	32.24166	34.75
CTD	CYBO19D3	2005-09-12T07:16:00.000	32.33333	34.667
CTD	CYBO19E1	2005-09-12T08:10:00.000	32.41667	34.583
CTD	CYBO19F3	2005-09-12T09:34:00.000	32.33333	34.5
CTD	CYBO19F4	2005-09-12T11:10:00.000	32.5	34.5
CTD	CYBO19E2	2005-09-13T12:38:00.000	32.58333	34.583
CTD	CYBO19F5	2005-09-13T01:51:00.000	32.66667	34.5
CTD	CYBO19F6	2005-09-13T06:26:00.000	32.83333	34.5
CTD	CYBO20D16	2006-05-16T12:40:00.000	33.085	34.623
CTD	CYBO20E5a	2006-05-16T01:04:00.000	33.0845	34.583
CTD	CYBO20D17	2006-05-16T01:55:00.000	33.1667	34.617
CTD	CYBO20E6	2006-05-16T02:32:00.000	33.1667	34.583
CTD	CYBO20F9	2006-05-16T03:45:00.000	33.1667	34.5
CTD	CYBO20E7	2006-05-16T06:10:00.000	33.2767	34.402
CTD	CYBO20F10	2006-05-16T07:45:00.000	33.3333	34.5
CTD	CYBO20E8	2006-05-16T08:50:00.000	33.3333	34.583
CTD	CYBO20D10	2006-05-16T10:25:00.000	33.5	34.667
CTD	CYBO20E9	2006-05-16T11:25:00.000	33.5	34.583
CTD	CYBO20F12	2006-05-17T01:00:00.000	33.6667	34.5
CTD	CYBO20C6	2006-05-17T03:40:00.000	33.75	34.75
CTD	CYBO20B4a	2006-05-17T04:57:00.000	33.6717	34.83
CTD	CYBO20A6a	2006-05-17T05:42:00.000	33.7497	34.883
CTD	CYBO20B6	2006-05-17T06:43:00.000	33.8333	34.833
CTD	CYBO20D13	2006-05-17T08:39:00.000	34.0	34.667
CTD	CYBO20C8	2006-05-17T09:59:00.000	34.0	34.75
CTD	CYBO20A8	2006-05-17T11:43:00.000	34.0	34.917
CTD	CYBO20A9	2006-05-17T01:00:00.000	34.1667	34.917
CTD	CYBO20B8	2006-05-17T02:08:00.000	34.1667	34.833
CTD	CYBO20C10	2006-05-17T03:42:00.000	34.3333	34.75
CTD	CYBO20B9	2006-05-17T05:05:00.000	34.3333	34.833
CTD	CYBO20A12	2006-05-17T06:52:00.000	34.5	34.917
CTD	CYBO20C11	2006-05-17T08:58:00.000	34.6667	34.75
CTD	CYBO20F17	2006-05-17T11:25:00.000	34.6667	34.5
CTD	CYBO20F16	2006-05-18T02:10:00.000	34.3333	34.5
CTD	CYBO20H7a	2006-05-18T04:34:00.000	34.3333	34.25
CTD	CYBO20H6	2006-05-18T07:17:00.000	34.0	34.25
CTD	CYBO20F14	2006-05-18T09:40:00.000	34.0	34.5
CTD	CYBO20H5	2006-05-18T01:49:00.000	33.5	34.25
CTD	CYBO20I6	2006-05-18T04:04:00.000	33.5	34.0
CTD	CYBO20I7	2006-05-18T07:27:00.000	34.0	34.0
CTD	CYBO20I8	2006-05-18T10:55:00.000	34.5	34.0
CTD	CYBO20J7	2006-05-19T03:04:00.000	34.5	33.5
CTD	CYBO20J6	2006-05-19T06:42:00.000	34.0	33.5
CTD	CYBO20J5	2006-05-19T10:18:00.000	33.5	33.5
CTD	CYBO20K5a	2006-05-19T01:17:00.000	33.25	33.25
CTD	CYBO20K4	2006-05-19T04:00:00.000	33.0	33.0
CTD	CYBO20P4	2006-05-20T12:30:00.000	33.0	31.75
CTD	CYBO20O4	2006-05-20T02:24:00.000	33.0	32.0
CTD	CYBO20N4	2006-05-20T04:24:00.000	33.0	32.25
CTD	CYBO20M4	2006-05-20T06:47:00.000	33.0	32.5
CTD	CYBO20L4	2006-05-20T09:29:00.000	33.0	32.75
CTD	CYBO20K4a	2006-05-20T01:54:00.000	33.0	33.25
CTD	CYBO20J4	2006-05-20T04:38:00.000	33.0	33.5
CTD	CYBO20I5J4	2006-05-20T07:28:00.000	33.0	33.75
CTD	CYBO20I5	2006-05-20T10:14:00.000	33.0	34.0
CTD	CYBO20H4	2006-05-21T12:55:00.000	33.0	34.25
CTD	CYBO20F7	2006-05-21T02:10:00.000	33.0	34.5
CTD	CYBO20G4a	2006-05-21T03:22:00.000	33.0	34.417
CTD	CYBO20G3b	2006-05-21T05:50:00.000	32.8333	34.417
CTD	CYBO20H3	2006-05-21T09:15:00.000	32.5	34.25
CTD	CYBO20I4	2006-05-21T11:43:00.000	32.5	34.0
CTD	CYBO20J3	2006-05-22T03:50:00.000	32.5	33.5
CTD	CYBO20J2	2006-05-22T07:16:00.000	32.0	33.5
CTD	CYBO20J1	2006-05-22T10:57:00.000	31.5	33.5
CTD	CYBO20I2	2006-05-22T03:00:00.000	31.5	34.0
CTD	CYBO20H1	2006-05-22T05:17:00.000	31.5	34.25
CTD	CYBO20F1	2006-05-22T07:37:00.000	31.5	34.5
CTD	CYBO20A0	2006-05-22T10:25:00.000	31.5	35.0
CTD	CYBO20A2	2006-05-23T02:29:00.000	32.0	35.0
CTD	CYBO20A3	2006-05-23T04:14:00.000	32.1667	34.917
CTD	CYBO20C2C3	2006-05-23T06:02:00.000	32.2417	34.75
CTD	CYBO20B1D1	2006-05-23T08:01:00.000	32.0	34.75
CTD	CYBO20F2	2006-05-23T10:47:00.000	32.0	34.5
CTD	CYBO20H2	2006-05-23T01:03:00.000	32.0	34.25
CTD	CYBO20I3	2006-05-23T03:26:00.000	32.0	34.0
CTD	CYBO20H2H3	2006-05-23T06:20:00.000	32.25	34.25
CTD	CYBO20F3	2006-05-23T09:15:00.000	32.3333	34.5
CTD	CYBO20D3a	2006-05-23T11:03:00.000	32.25	34.583
CTD	CYBO20E1	2006-05-24T12:38:00.000	32.4167	34.583
CTD	CYBO20F4	2006-05-24T02:01:00.000	32.5	34.5
CTD	CYBO20E2	2006-05-24T03:35:00.000	32.5833	34.583
CTD	CYBO20F5	2006-05-24T04:57:00.000	32.6667	34.5
CTD	CYBO20F6	2006-05-24T06:32:00.000	32.8333	34.5
CTD	CYBO21D16	2007-07-21T10:50:00.000	33.0833	34.625
CTD	CYBO21E6	2007-07-21T11:35:00.000	33.1667	34.583
CTD	CYBO21F9	2007-07-21T12:40:00.000	33.1667	34.5
CTD	CYBO21E7	2007-07-21T01:50:00.000	33.25	34.417
CTD	CYBO21F10	2007-07-21T03:15:00.000	33.3333	34.5
CTD	CYBO21E8	2007-07-21T04:20:00.000	33.3333	34.583
CTD	CYBO21E9	2007-07-21T05:37:00.000	33.5	34.583
CTD	CYBO21F12	2007-07-21T07:05:00.000	33.6667	34.5
CTD	CYBO21D11	2007-07-21T08:35:00.000	33.6667	34.667
CTD	CYBO21C6	2007-07-21T10:00:00.000	33.75	34.75
CTD	CYBO21A6a	2007-07-21T11:30:00.000	33.75	34.883
CTD	CYBO21B6	2007-07-22T12:35:00.000	33.8333	34.833
CTD	CYBO21D13	2007-07-22T02:30:00.000	34.0	34.667
CTD	CYBO21C8	2007-07-22T03:42:00.000	34.0	34.75
CTD	CYBO21A9	2007-07-22T06:35:00.000	34.1667	34.917
CTD	CYBO21B8	2007-07-22T07:40:00.000	34.1667	34.833
CTD	CYBO21C10	2007-07-22T09:12:00.000	34.3333	34.75
CTD	CYBO21B9	2007-07-22T10:23:00.000	34.3333	34.833
CTD	CYBO21A12	2007-07-22T11:55:00.000	34.5	34.917
CTD	CYBO21C11	2007-07-22T02:00:00.000	34.6667	34.75
CTD	CYBO21F17	2007-07-22T04:17:00.000	34.6667	34.5
CTD	CYBO21F16	2007-07-22T06:46:00.000	34.3333	34.5
CTD	CYBO21H7a	2007-07-22T09:07:00.000	34.3333	34.25
CTD	CYBO21H6	2007-07-22T11:35:00.000	34.0	34.25
CTD	CYBO21F14	2007-07-23T01:42:00.000	34.0	34.5
CTD	CYBO21H5	2007-07-23T05:10:00.000	33.5	34.25
CTD	CYBO21I6	2007-07-23T07:20:00.000	33.5	34.0
CTD	CYBO21I7	2007-07-23T10:20:00.000	34.0	34.0
CTD	CYBO21I8	2007-07-23T01:25:00.000	34.5	34.0
CTD	CYBO21J7	2007-07-23T05:00:00.000	34.5	33.5
CTD	CYBO21J6	2007-07-23T08:10:00.000	34.0	33.5
CTD	CYBO21J5	2007-07-23T11:20:00.000	33.5	33.5
CTD	CYBO21K5a	2007-07-24T02:08:00.000	33.25	33.25
CTD	CYBO21K4	2007-07-24T05:55:00.000	33.0	33.0
CTD	CYBO21O4	2007-07-24T12:05:00.000	33.0	32.0
CTD	CYBO21N4	2007-07-24T02:05:00.000	33.0	32.25
CTD	CYBO21M4	2007-07-24T04:40:00.000	33.0	32.5
CTD	CYBO21L4	2007-07-24T07:05:00.000	33.0	32.75
CTD	CYBO21K4a	2007-07-24T10:45:00.000	33.0	33.25
CTD	CYBO21J4	2007-07-25T12:50:00.000	33.0	33.5
CTD	CYBO21I5J4	2007-07-25T03:00:00.000	33.0	33.75
CTD	CYBO21I5	2007-07-25T05:14:00.000	33.0	34.0
CTD	CYBO21H4	2007-07-25T07:26:00.000	33.0	34.25
CTD	CYBO21F5	2007-07-25T10:25:00.000	32.6667	34.5
CTD	CYBO21F6	2007-07-25T11:50:00.000	32.8333	34.5
CTD	CYBO21F7	2007-07-25T01:07:00.000	33.0	34.5
CTD	CYBO21G4a	2007-07-25T05:20:00.000	33.0	34.417
CTD	CYBO21G3b	2007-07-25T07:03:00.000	32.8333	34.417
CTD	CYBO21H3	2007-07-25T09:40:00.000	32.5	34.25
CTD	CYBO21I4	2007-07-25T11:50:00.000	32.5	34.0
CTD	CYBO21J3	2007-07-26T03:48:00.000	32.5	33.5
CTD	CYBO21J2	2007-07-26T07:14:00.000	32.0	33.5
CTD	CYBO21J1	2007-07-26T10:38:00.000	31.5	33.5
CTD	CYBO21I2	2007-07-26T02:26:00.000	31.5	34.0
CTD	CYBO21H1	2007-07-26T04:45:00.000	31.5	34.25
CTD	CYBO21F1	2007-07-26T06:45:00.000	31.5	34.5
CTD	CYBO21C1	2007-07-26T09:00:00.000	31.5	34.75
CTD	CYBO21A0	2007-07-26T11:10:00.000	31.5	35.0
CTD	CYBO21A2	2007-07-27T02:26:00.000	32.0	35.0
CTD	CYBO21A3	2007-07-27T04:14:00.000	32.1667	34.917
CTD	CYBO21C2C3	2007-07-27T06:05:00.000	32.2417	34.75
CTD	CYBO21D1	2007-07-27T08:20:00.000	32.0	34.667
CTD	CYBO21F2	2007-07-27T10:05:00.000	32.0	34.5
CTD	CYBO21H2	2007-07-27T12:14:00.000	32.0	34.25
CTD	CYBO21I3	2007-07-27T02:18:00.000	32.0	34.0
CTD	CYBO21I3I4	2007-07-27T04:05:00.000	32.25	34.0
CTD	CYBO21H2H3	2007-07-27T06:19:00.000	32.25	34.25
CTD	CYBO21F3	2007-07-27T08:50:00.000	32.3333	34.5
CTD	CYBO21E1	2007-07-27T10:35:00.000	32.4167	34.583
CTD	CYBO21F4	2007-07-27T11:58:00.000	32.5	34.5
CTD	CYBO22D16	2009-08-18T05:59:00.000	33.0833	34.625
CTD	CYBO22E6	2009-08-18T06:49:00.000	33.1667	34.583
CTD	CYBO22F9	2009-08-18T07:56:00.000	33.1667	34.5
CTD	CYBO22E7	2009-08-18T09:15:00.000	33.25	34.417
CTD	CYBO22F10	2009-08-18T10:55:00.000	33.3333	34.5
CTD	CYBO22E8	2009-08-19T12:33:00.000	33.3333	34.583
CTD	CYBO22E9	2009-08-19T02:00:00.000	33.5	34.583
CTD	CYBO22F12	2009-08-19T03:51:00.000	33.6667	34.5
CTD	CYBO22D11	2009-08-19T05:22:00.000	33.6667	34.667
CTD	CYBO22C6	2009-08-19T06:40:00.000	33.75	34.75
CTD	CYBO22A6a	2009-08-19T08:10:00.000	33.75	34.883
CTD	CYBO22B6	2009-08-19T09:15:00.000	33.8333	34.833
CTD	CYBO22D13	2009-08-19T11:19:00.000	34.0	34.667
CTD	CYBO22C8	2009-08-19T12:30:00.000	34.0	34.75
CTD	CYBO22A9	2009-08-19T02:34:00.000	34.1667	34.917
CTD	CYBO22B8	2009-08-19T03:45:00.000	34.1667	34.833
CTD	CYBO22C10	2009-08-19T05:27:00.000	34.3333	34.75
CTD	CYBO22B9	2009-08-19T06:40:00.000	34.3333	34.833
CTD	CYBO22A12	2009-08-19T08:24:00.000	34.5	34.917
CTD	CYBO22C11	2009-08-19T10:28:00.000	34.6667	34.75
CTD	CYBO22F17	2009-08-20T12:47:00.000	34.6667	34.5
CTD	CYBO22F16	2009-08-20T03:25:00.000	34.3333	34.5
CTD	CYBO22H7a	2009-08-20T05:40:00.000	34.3333	34.25
CTD	CYBO22H6	2009-08-20T08:15:00.000	34.0	34.25
CTD	CYBO22F14	2009-08-20T10:38:00.000	34.0	34.5
CTD	CYBO22H5	2009-08-20T02:26:00.000	33.5	34.25
CTD	CYBO22I6	2009-08-20T04:37:00.000	33.5	34.0
CTD	CYBO22I7	2009-08-20T07:55:00.000	34.0	34.0
CTD	CYBO22I8	2009-08-20T11:00:00.000	34.5	34.0
CTD	CYBO22J7	2009-08-21T02:40:00.000	34.5	33.5
CTD	CYBO22J6	2009-08-21T06:00:00.000	34.0	33.5
CTD	CYBO22J5	2009-08-21T09:25:00.000	33.5	33.5
CTD	CYBO22K5a	2009-08-21T12:15:00.000	33.25	33.25
CTD	CYBO22K4	2009-08-21T02:57:00.000	33.0	33.0
CTD	CYBO22O4	2009-08-21T09:45:00.000	33.0	32.0
CTD	CYBO22N4	2009-08-21T11:55:00.000	33.0	32.25
CTD	CYBO22M4	2009-08-22T02:14:00.000	33.0	32.5
CTD	CYBO22L4	2009-08-22T04:35:00.000	33.0	32.75
CTD	CYBO22K4a	2009-08-22T08:25:00.000	33.0	33.25
CTD	CYBO22J4	2009-08-22T10:46:00.000	33.0	33.5
CTD	CYBO22I5J4	2009-08-22T01:09:00.000	33.0	33.75
CTD	CYBO22I5	2009-08-22T03:26:00.000	33.0	34.0
CTD	CYBO22F7	2009-08-22T11:15:00.000	33.0	34.5
CTD	CYBO22F6	2009-08-23T01:00:00.000	32.8333	34.5
CTD	CYBO22G3b	2009-08-23T02:06:00.000	32.8333	34.417
CTD	CYBO22G4a	2009-08-23T03:41:00.000	33.0	34.417
CTD	CYBO22H4	2009-08-23T05:22:00.000	33.0	34.25
CTD	CYBO22H3	2009-08-23T08:50:00.000	32.5	34.25
CTD	CYBO22I4	2009-08-23T11:05:00.000	32.5	34.0
CTD	CYBO22J3	2009-08-23T03:14:00.000	32.5	33.5
CTD	CYBO22J2	2009-08-23T06:40:00.000	32.0	33.5
CTD	CYBO22J1	2009-08-23T10:08:00.000	31.5	33.5
CTD	CYBO22J0	2009-08-24T02:21:00.000	31.0	33.5
CTD	CYBO22I1	2009-08-24T06:20:00.000	31.0	34.0
CTD	CYBO22I2	2009-08-24T09:40:00.000	31.5	34.0
CTD	CYBO22H1	2009-08-24T11:55:00.000	31.5	34.25
CTD	CYBO22F1	2009-08-24T02:17:00.000	31.5	34.5
CTD	CYBO22F0	2009-08-24T05:38:00.000	31.0	34.5
CTD	CYBO22A01	2009-08-24T09:38:00.000	31.0	35.0
CTD	CYBO22A0	2009-08-25T01:02:00.000	31.5	35.0
CTD	CYBO22A2	2009-08-25T04:16:00.000	32.0	35.0
CTD	CYBO22A4	2009-08-25T06:04:00.000	32.1667	35.083
CTD	CYBO22A3	2009-08-25T07:59:00.000	32.1667	34.917
CTD	CYBO22C2C3	2009-08-25T09:53:00.000	32.2417	34.75
CTD	CYBO22D1	2009-08-25T12:01:00.000	32.0	34.667
CTD	CYBO22F2	2009-08-25T01:50:00.000	32.0	34.5
CTD	CYBO22H2	2009-08-25T04:07:00.000	32.0	34.25
CTD	CYBO22I3	2009-08-25T06:39:00.000	32.0	34.0
CTD	CYBO22I3J2	2009-08-25T08:55:00.000	32.0	33.75
CTD	CYBO22K1a	2009-08-26T01:50:00.000	31.5	33.25
CTD	CYBO22K2a	2009-08-26T05:15:00.000	32.0	33.25
CTD	CYBO22K3AA	2009-08-26T08:38:00.000	32.5	33.25
CTD	CYBO22MCS	2009-08-26T01:00:00.000	32.143	33.693
CTD	CYBO22MCS2	2009-08-26T02:15:00.000	32.1377	33.699
CTD	CYBO22I3I4	2009-08-26T04:30:00.000	32.25	34.0
CTD	CYBO22H2H3	2009-08-26T07:00:00.000	32.25	34.25
CTD	CYBO22F3	2009-08-26T09:33:00.000	32.3333	34.5
CTD	CYBO22E1	2009-08-26T11:10:00.000	32.4167	34.583
CTD	CYBO22F4	2009-08-28T12:58:00.000	32.5	34.5
CTD	CYBO23D16	2010-08-23T06:00:00.000	33.0833	34.625
CTD	CYBO23E6	2010-08-23T07:05:00.000	33.1667	34.583
CTD	CYBO23F9	2010-08-23T08:10:00.000	33.1667	34.5
CTD	CYBO23E7	2010-08-24T09:50:00.000	33.2553	34.417
CTD	CYBO23F10	2010-08-24T11:18:00.000	33.3333	34.499
CTD	CYBO23E8	2010-08-24T12:17:00.000	33.3333	34.583
CTD	CYBO23E9	2010-08-24T01:46:00.000	33.4995	34.583
CTD	CYBO23F12	2010-08-24T03:25:00.000	33.6667	34.5
CTD	CYBO23D11	2010-08-24T04:55:00.000	33.6667	34.667
CTD	CYBO23C6	2010-08-24T06:17:00.000	33.75	34.75
CTD	CYBO23A6a	2010-08-24T07:50:00.000	33.75	34.883
CTD	CYBO23B6	2010-08-24T08:55:00.000	33.8333	34.833
CTD	CYBO23D13	2010-08-24T11:15:00.000	34.0	34.667
CTD	CYBO23C8	2010-08-24T12:30:00.000	34.0	34.75
CTD	CYBO24L4	2012-10-30T01:50:00.000	33.0002	32.749
CTD	CYBO24K4a	2012-10-30T07:50:00.000	33.0003	33.249
CTD	CYBO24K4	2012-10-30T10:55:00.000	33.0008	33.0
CTD	CYBO24J4	2012-10-30T04:33:00.000	32.9993	33.499
CTD	CYBO24I5J4	2012-10-30T01:29:00.000	32.9993	33.749
CTD	CYBO24I5	2012-10-29T10:26:00.000	33.0007	33.999
CTD	CYBO24H4	2012-10-29T07:05:00.000	32.9995	34.249
CTD	CYBO24G4a	2012-10-29T04:22:00.000	32.9988	34.416
CTD	CYBO24F7	2012-10-29T02:48:00.000	32.9978	34.501
CTD	CYBO26F7	2013-12-24T09:36:00.000	33.0	34.5
CTD	CYBO26H4	2013-12-24T04:16:00.000	33.0	34.25
CTD	CYBO26I5	2013-12-24T12:43:00.000	33.0	34.0
CTD	CYBO26I5J4	2013-12-24T09:34:00.000	33.0012	33.749
CTD	CYBO26J4	2013-12-23T05:58:00.000	33.0	33.5
CTD	CYBO26G4a	2013-12-24T07:16:00.000	33.0	34.416
CTD	CYBO26HC14	2013-12-23T05:28:00.000	33.331	32.754
CTD	CYBO26HC15	2013-12-23T02:09:00.000	33.6627	32.767
CTD	CYBO26H155	2013-12-22T10:43:00.000	34.0033	32.785
CTD	CYBO26K4A	2013-12-24T07:16:00.000	33.0	33.25
CTD	CYBO26K4	2013-12-23T11:40:00.000	33.0	33.0
CTD	CYBO26L4	2013-12-23T08:42:00.000	33.0	32.75
CTD	CYBO25J5	2012-12-23T10:51:00.000	33.5	33.5
CTD	CYBO25J6	2012-12-23T05:48:00.000	34.0	33.5
CTD	CYBO25J4	2012-12-24T02:57:00.000	33.0	33.5
CTD	CYBO25J3	2012-12-24T10:20:00.000	32.5	33.5
CTD	CYBO25J34a	2012-12-24T06:19:00.000	32.6637	33.67
CTD	CYBO25J2	2012-12-24T02:19:00.000	32.0	33.5
CTD	CYBO25I2	2012-12-24T09:51:00.000	32.0	34.0
CTD	CYBO25H2	2012-12-25T02:02:00.000	32.0	34.25
CTD	CYBO25I3a	2012-12-25T09:49:00.000	32.5	34.124
CTD	CYBO25F4	2012-12-25T03:36:00.000	32.5	34.5
CTD	CYBO25F2	2012-12-25T05:44:00.000	32.0	34.5
CTD	CYBO25H3	2012-12-25T06:57:00.000	32.5	34.25
CTD	CYBO25B3	2012-12-25T12:08:00.000	32.25	34.833
CTD	CYBO25D1	2012-12-25T08:45:00.000	32.0	34.667
CTD	CYBO25F7	2012-12-26T04:16:00.000	33.0	34.5
CTD	CYBO25H4	2012-12-26T06:46:00.000	33.0	34.25
CTD	CYBO25I5a	2012-12-26T09:08:00.000	32.9992	34.119
CTD	CYBO25I5I6	2012-12-26T05:36:00.000	33.2402	33.851
CTD	CYBO25I5J4	2012-12-26T02:52:00.000	33.0012	33.749
CTD	CYBO25I5	2012-12-26T11:35:00.000	33.0	34.0
CTD	CYBO25I6	2012-12-26T09:12:00.000	33.5	34.0
CTD	CYBO25A8	2012-12-27T11:04:00.000	34.0	34.917
CTD	CYBO25E8	2012-12-27T04:40:00.000	33.3333	34.583
CTD	CYBO25D13	2012-12-27T01:13:00.000	34.0	34.667
CTD	CYBO25D10	2012-12-27T06:53:00.000	33.5	34.667
[truncated: 670 more rows]
